1 **Elucidating small RNA pathways in *Arabidopsis thaliana* egg cells**

2

3 Stefanie Sprunck<sup>1\*</sup>, Marc Urban<sup>1</sup>, Nicholas Strieder<sup>2</sup>, Maria Lindemeier<sup>1</sup>, Andrea Bleckmann<sup>1</sup>,  
4 Maurits Evers<sup>2</sup>, Thomas Hackenberg<sup>1</sup>, Christoph Möhle<sup>3</sup>, Thomas Dresselhaus<sup>1</sup>, Julia C.  
5 Engelmann<sup>2,4\*</sup>

6

7 <sup>1</sup>Cell Biology and Plant Biochemistry, Regensburg Center for Biochemistry, University of  
8 Regensburg, Universitätsstrasse 31, 93053 Regensburg, Germany

9 <sup>2</sup>Statistical Bioinformatics, University of Regensburg, Am BioPark 9, University of  
10 Regensburg, 93053 Regensburg, Germany

11 <sup>3</sup>Kompetenzzentrum Fluoreszente Bioanalytik, University of Regensburg, Am BioPark 9,  
12 93053 Regensburg, Germany

13 <sup>4</sup>Department of Marine Microbiology and Biogeochemistry, NIOZ Royal Netherlands Institute  
14 for Sea Research and Utrecht University, 1790 AB, Den Burg, The Netherlands

15

16 \*authors to whom correspondence should be addressed

17 email: stefanie.sprunck@ur.de, phone: +49/(0)941 943 3005, ORCID number 0000-0002-  
18 9732-9237

19 email: julia.engelmann@nioz.nl, phone: +31 (0) 222 369 388, ORCID number 0000-0002-  
20 4160-5474

21

22

23

24

25

26

27

28

29

30

31

32

33 *Running head:* Small RNA pathways in *Arabidopsis* egg cells

34

35 *Keywords:* AGO, egg cell, synergid cell, signaling, miRNA, transposable element

36

37

## 1 **Summary**

- 2 • Small RNA pathway components and small RNA profiles of flowering plant egg cells are  
3 largely unexplored, mainly because they are not easily accessible but deeply buried inside  
4 the ovary.
- 5 • We describe here the utilization of proliferating callus tissue that adopted transcriptome  
6 features of Arabidopsis egg cell as a tool to explore small RNA pathway components and  
7 small RNA profiles in egg cells. We furthermore complement our studies with mRNA-Seq  
8 data from isolated Arabidopsis egg cells and provide data validation by promoter-reporter  
9 studies and whole mount *in situ* hybridization.
- 10 • Sequencing of small RNA libraries demonstrate the predominance of TE-derived siRNAs in  
11 the egg cell-related callus. TE-features and expression profiles suggest post-transcriptional  
12 silencing of activated *Gypsy*-like LTR retrotransposons, whereas the majority of class II  
13 DNA transposons belonging to *Copia*, *CACTA*, *hAT*-like and *Mutator* superfamilies are  
14 subjected to transcriptional silencing.
- 15 • Small RNA-seq furthermore led to the identification of differentially expressed known and  
16 novel miRNAs whose expression in the egg cell was verified by small RNA whole mount  
17 *in situ* hybridization. Both the strong expression of miRNAs in the egg-cell-adjointing  
18 synergids and the secretion of miRNAs into the micropyle suggest hitherto undescribed roles  
19 for these accessory cells in intercellular communication with the egg cell and the arriving  
20 pollen tube.
- 21 • In conclusion, our datasets provide valuable and comprehensive resources to study small  
22 RNA pathways and small-RNA-mediated epigenetic reprogramming during egg cell  
23 differentiation and the onset of plant embryogenesis.
- 24  
25  
26

## 1 Introduction

2 The life cycle of flowering plants alternates between a dominant, diploid sporophytic phase and  
3 a short haploid gametophytic phase. Contrary to most animals, where the germline is set aside  
4 early during development and persists throughout the life history of the organism, flowering  
5 plant egg cells and sperm cells differentiate at a late stage of adult development, when flowers  
6 with reproductive organs are formed. Furthermore, flowering plant gametes are not direct  
7 products of meiosis but develop as part of a multicellular haploid gametophyte, where they are  
8 accompanied by accessory cells, some of which are pivotal in assuring successful double  
9 fertilization (Yadegari and Drews 2004; Higashiyama and Yang, 2017).

10 In most flowering plants, including *Arabidopsis*, female gametophyte development begins early  
11 in ovule development, when a sub-epidermal cell differentiates into the diploid megaspore  
12 mother cell which will initiate meiosis (megasporogenesis). After meiosis, only one megaspore  
13 develops into the female gametophyte (megagametogenesis). Whereas the other three  
14 megaspores undergo programmed cell death, this functional megaspore performs three free  
15 nuclear division cycles resulting in an eight-nucleate syncytium (Sprunck and Groß-Hardt  
16 2011). Cell fate decisions are affected by positional cues, acting on the daughter nuclei in the  
17 syncytium according to their position along the distal (micropylar) to proximal (chalazal) axis  
18 (Skinner and Sundaresan, 2018). During the following cellularization, four cell types are  
19 established: The egg cell and two accessory synergid cells locate close to the micropylar  
20 entrance point of the pollen tube, two polar nuclei fuse and form the nucleus of the large central  
21 cell, whereas three antipodal cells locate to the chalazal pole of the female gametophyte. Thus,  
22 three major cell specification events occur during female gametophyte development: (i) the  
23 specification of the megaspore mother cell from a sporophytic precursor (somatic-to-  
24 reproductive cell fate transition); (ii) the selection of one haploid megaspore that will proceed  
25 with megagametogenesis; (iii) the specification of four distinct cell types during cellularization  
26 of the female gametophyte.

27 Over the past years, small RNA-mediated gene silencing has emerged as one of the most  
28 important mechanisms in regulating gene expression and repressing transposable elements  
29 (TEs) at the transcriptional or posttranscriptional level. Regulatory small non-coding RNAs  
30 include miRNAs (microRNAs), siRNAs (small interfering RNAs), animal-specific PIWI-  
31 interacting RNAs (piRNAs), as well as plant-specific tasiRNAs (*trans*-acting siRNAs) and  
32 phasiRNAs (phased secondary siRNAs). Core components of all small RNA-mediated  
33 silencing processes are Argonaute proteins (AGOs). Small RNAs are loaded onto AGOs to

1 form multimeric effector complexes, which mediate sequence-specific post-transcriptional  
2 gene silencing the RNA level, or transcriptional gene silencing at the chromatin level (Borges  
3 and Martienssen, 2015; Feng and Qi, 2016; Nonomura, 2018).

4 In the germline of mammals and insects, PIWI-clade AGOs and adaptive piRNA genomic  
5 clusters play important roles in repressing TEs but also in the regulation of endogenous gene  
6 expression programs regulating germline stem cell maintenance, gametogenesis, maternal-to-  
7 zygotic transition and embryonic patterning (Vagin et al., 2006; Brennecke et al., 2007; Rouget  
8 et al., 2010; Rojas-Ríos and Simonelig, 2018). Although flowering plant genomes lack the  
9 PIWI-clade AGOs and piRNAs, there is substantial evidence that members of the AGO clade  
10 and mobile small noncoding RNAs control the somatic-to-reproductive cell fate transition and  
11 meiotic progression during megasporogenesis (Nonomura et al., 2007; Olmedo-Monfil et al.,  
12 2010; Singh et al., 2011; Liu et al., 2016). Furthermore, somatic small RNA pathways also  
13 promote gametogenesis (Tucker et al., 2012) and chromatin remodeling during gametogenesis  
14 is accompanied by the activation of transposable elements (TEs) and by histone replacement  
15 and histone modifications, respectively (Ingouff et al., 2010; She and Baroux, 2015). However,  
16 the impact of sncRNAs on chromatin changes, the transcriptional landscape and egg cell  
17 identity remains to be explored.

18 Here, we describe the utilization of a callus-like Arabidopsis cell line with egg-related  
19 transcriptomic features as a tool to explore small RNA profiles and small RNA pathway  
20 components in egg cells. Egg cell-related cell lines were generated by expressing RKD2, a  
21 family member of the plant-specific RWP-RK DOMAIN CONTAINING (RKD) transcription  
22 factors, ectopically in Arabidopsis seedlings. After validating the previously described egg-like  
23 transcriptomic features (Köszegi et al., 2011), we performed Illumina sequencing to investigate  
24 the small RNA profile and transcriptome in comparison to that from hormone-induced control  
25 calli. We furthermore complemented our studies with transcriptome data from isolated  
26 Arabidopsis egg cells and validated expression patterns in the Arabidopsis egg cell by  
27 promoter-reporter studies and whole mount in situ hybridization. Our studies revealed  
28 differentially expressed TE-derived siRNAs in the egg cell-related callus, indicating selective  
29 silencing and reactivation of TEs, reminiscent to the male germline. Beside identifying known  
30 and novel miRNAs in the egg cell, our results suggest a yet unknown role for the accessory  
31 synergid cells in intercellular communication with the egg cell and the arriving pollen tube. Our  
32 comprehensive small RNA and transcriptome data sets provide valuable resources to  
33 investigate small RNA pathways during egg cell differentiation and the onset of plant  
34 embryogenesis.

## 1 **Methods**

### 2 **Plant materials and growth conditions**

3 *Arabidopsis thaliana* ecotype Columbia (Col-0) was grown on soil under a short photoperiod  
4 (9 h of light, 21°C, 65% humidity) for 3 to 4 weeks, followed by a long photoperiod (16 h of  
5 light, 8,500 lux, 21°C, 65% humidity). To generate hormone-induced CIM callus, root explants  
6 were harvested from 2-week-old *Arabidopsis* seedlings (Col-0) grown in sterile culture on half  
7 strength MS medium supplemented with 2% (w/v) sucrose under a long photoperiod. 5 to 10  
8 mm long root segments were cultured on callus-inducing medium (CIM) composed of 1x  
9 Gamborg's B-5 medium B5 with 0.5 g/L MES, 20 g/L glucose, 1x Gamborg's vitamin solution  
10 and 1% Phytoagar, supplemented with 2,4-D (final concentration 500 µg/L) and kinetin (final  
11 concentration 50 µg/L). Calli appeared after 7 to 10 days and were propagated in two-week  
12 subculture intervals on CIM medium.

13

### 14 **Cloning and generation of RKD2-induced callus**

15 Pistils from flowers at developmental stage 12 (Smyth et al., 1990) were harvested to purify  
16 mRNA and generate cDNA as described previously (Sprunck et al., 2012). To generate callus  
17 lines with egg cell-like expression profile, the coding sequence of RKD2 (AT1G74480) was  
18 amplified from pistil cDNA using the primer pair RKD2fw /RKD2rev (Table S1), cloned into  
19 pENTR/D-TOPO (Thermo Fisher Scientific) and subsequently transferred into the  
20 GATEWAY-compatible destination vector pH7FWG2.0 (Karimi et al., 2002) via LR clonase  
21 reaction. The resulting expression vector *pH\_35Sp:RKD2-GFP* was used for floral dip  
22 transformation of *Arabidopsis* (Clough and Bent, 1998). T1 seeds of transformed plants were  
23 surface-sterilized with 1% NaOCl and 70 % ethanol for 5 min each, washed 5 times with  
24 sterilized water and then plated on half-strength Murashige and Skoog (MS) medium with 2%  
25 (w/v) sucrose, 1% Phytoagar, and Hygromycin (30 µg/mL). RKD2-induced proliferating cells  
26 appeared 20 to 30 days later and were propagated in two-week subculture intervals on ½ MS,  
27 2% (w/v) sucrose, 1% Phytoagar, Hygromycin (30 µg/mL). For RNA and protein work, callus  
28 material was collected with a sterile scalpel blade and immediately frozen in liquid nitrogen.

29

## 1 Egg cell and central cell isolation

2 Arabidopsis egg and central cells were isolated from mature ovules according to a previously  
3 published protocol (Englhart et al., 2017). After isolation, cells were washed two times in  
4 mannitol solution as described, transferred to 500  $\mu$ L Eppendorf<sup>®</sup> LoBind tubes and  
5 immediately frozen in liquid nitrogen.

## 7 Protein work

8 100 mg frozen callus material was ground to fine power, vortexed in 200  $\mu$ L ice-cold extraction  
9 buffer (20 mM Tris pH 7.5, 300 mM NaCl, 5 mM MgCl<sub>2</sub>, 0.1% Triton X-100, 1x complete  
10 Proteinase-Inhibitor Cocktail from Roche, 50  $\mu$ M MG-132) and incubated for ten minutes on  
11 ice. After centrifugation (10 minutes, 16.000 x g) the protein concentration of the clear  
12 supernatant was determined by the Bradford protein assay (Bio-Rad). After SDS-PAGE (7.5%),  
13 proteins were blotted on nitrocellulose (Amersham Protran 0.45 NC), stained with Ponceau S  
14 solution and blocked for one hour at room temperature in TBS-T (50 mM Tris/HCl pH 7.5, 150  
15 mM NaCl, 0.2% Tween-20) supplemented with 5% milk powder. After washing in TBS-T (3x  
16 for 10 min) the membrane was incubated overnight at 4°C with the primary antibody.  
17 Polyclonal peptide antibodies against AGO proteins (Agriser) were diluted as recommended  
18 by the supplier. Horseradish peroxidase (HRP)-coupled anti-rabbit IgG was used as secondary  
19 antibody. Luminol-based HRP-substrate (HRP juice, PJK GmbH) was used for detection.

## 21 Total RNA and small RNA isolation for RNAseq

22 Total RNA (including low molecular weight RNA) was extracted from 200 to 300 mg of frozen  
23 callus, using the RNeasy Plant Mini Kit (Qiagen) and according to the manufacturer's  
24 instructions. Three batches of each callus type (RKD2-induced callus and hormone-induced  
25 CIM callus, respectively) were used for RNA extraction and library preparation. For the RKD2-  
26 induced callus, sample 1 was generated from cell line 1 and samples 2 and 3 were generated  
27 from cell line 2. Purity and integrity of total RNA was assessed on the Agilent 2100 Bioanalyzer  
28 with the RNA 6000 Pico LabChip reagent set (Agilent). RNA extraction from egg cells was  
29 carried out at the genomics core facility of the University of Regensburg, Germany (Center for  
30 Fluorescent Bioanalytics (KFB); [www.kfb-regensburg.de](http://www.kfb-regensburg.de)). For isolated egg cells, three  
31 replicates of 25 to 30 pooled egg cells were used for total RNA extraction according to the  
32 "Purification of total RNA from animal and human cells" protocol of the RNeasy Plus Micro  
33 Kit (Qiagen). In brief, RLT Plus buffer containing  $\beta$ -mercaptoethanol was added to the frozen  
34 cells and the sample was homogenized by vortexing for 30 sec. Genomic DNA contamination

1 was removed using gDNA Eliminator spin columns. Ethanol was added and the samples were  
2 applied to RNeasy MinElute spin columns followed by several washing steps. Total RNA was  
3 eluted in 12 µl of nuclease-free water.

#### 4 5 Library preparation and Illumina Next-Generation-Sequencing

6 Library preparation and deep sequencing was carried out by the KFB (Regensburg, Germany).  
7 For callus tissues, the same batch of total RNA was used for mRNA and small RNA library  
8 preparation, respectively. Poly(A)<sup>+</sup> mRNA was selectively enriched from 500 ng total RNA  
9 using oligo-dT beads (NEBNext Poly(A) mRNA Magnetic Isolation Module; New England  
10 Biolabs, Ipswich, USA). The NEBNext Ultra RNA Library Prep Kit for Illumina (New England  
11 Biolabs) was used to prepare mRNA libraries, following the manufacturers guidelines. Small  
12 RNA library preparation was carried out according to the TruSeq Small RNA sample  
13 preparation guide (Illumina, Inc.), with the following modifications: For each of the six samples  
14 (three biological replicates), 1 µg RNA was used for ligation of the RNA 3' and the RNA 5'  
15 adapters, followed by reverse transcription to create single stranded cDNA. The cDNA was  
16 then PCR amplified for 12 cycles using a universal and an index primer. Following magnetic  
17 bead clean up (Agencourt AMPure XP, Beckman Coulter), small RNA species were gel-  
18 purified using an automated nucleic acid fractionation/extraction system with a collection width  
19 of 30 bp (LabChip XT DNA 300 Kit, Caliper Life Sciences). For egg cell libraries, the  
20 SMARTer Ultra Low Input RNA Kit for Sequencing v4 (Clontech Laboratories, Inc.) was used  
21 to generate first strand cDNA from 50 % of the extracted RNA. Double stranded cDNA was  
22 amplified by LD PCR (18 cycles) and purified via magnetic bead clean-up. Library preparation  
23 was carried out as described in the Illumina Nextera XT Sample Preparation Guide (Illumina,  
24 Inc.). 150 pg of input cDNA were tagged by the Nextera XT transposome. The products  
25 were purified and amplified via a limited-cycle PCR program to generate multiplexed  
26 sequencing libraries. For the PCR step 1:5 dilutions of index 1 (i7) and index 2 (i5) primers  
27 were used.

28

#### 29 Illumina deep sequencing

30 Sequencing libraries were individually quantified using the KAPA SYBR FAST ABI Prism  
31 Library Quantification Kit (Kapa Biosystems, Inc.). Equimolar amounts of all libraries were  
32 pooled, and the pools were used for cluster generation on the cBot (TruSeq SR Cluster Kit v3).  
33 All sequencing runs were performed on a HiSeq 1000 instrument using TruSeq SBS v3  
34 Reagents according to the Illumina HiSeq 1000 System User Guide. Callus and egg cell

1 libraries were sequenced for 100 cycles (2x100nt, paired end) on two lanes. The six small RNA  
2 libraries were sequenced for 50 cycles (single end) on a single lane.

3

#### 4 **Bioinformatic Analysis**

5 FASTQC (<http://www.bioinformatics.babraham.ac.uk/projects/fastqc/>) was used to assess the  
6 quality of the different RNA-Seq libraries. Subsequently, low quality bases and adapter  
7 remnants were trimmed with Trimmomatic (Bolger et al. 2014) (small RNA parameters were  
8 ILLUMINACLIP:2:30:12 TRAILING:20 LEADING:20 MINLEN:18, searching for TruSeq  
9 Small RNA adapter remnants; mRNA parameters were ILLUMINACLIP:2:30:10:2:true  
10 TRAILING:3 LEADING:3 MINLEN:25, searching for Illumina universal paired-end and  
11 indexed adapters in the calli data, and for Nextera and SMARTer sequence remnants in the egg  
12 cell reads). The resulting reads were aligned to the *Arabidopsis thaliana* reference genome  
13 TAIR10 (<http://www.arabidopsis.org/>). Small RNA reads were mapped with butter (Axtell,  
14 2014) with default parameters. Butter distributes reads mapping to multiple loci in the genome  
15 by an iterative process relying on the density distribution of uniquely aligned reads, and both  
16 unique and multi-mapping reads were considered. Alignment of mRNA reads was performed  
17 with Tophat2.0 (Kim et al., 2013) indicating an unstranded sequencing protocol and fragment  
18 length parameters retrieved from Bioanalyzer profiles (for callus mRNA: --mate-inner-dist 40  
19 --mate-std-dev 40, for egg cell pool mRNA: --mate-inner-dist 190 --mate-std-dev 100). The  
20 annotation was retrieved from EnsemblPlants (<ftp.ensemblgenomes.org>, *Arabidopsis\_thaliana*.  
21 TAIR10.22.gtf) (Kersey et al, 2014).

22 On the small RNA dataset, count tables required for differential expression analysis were  
23 produced using R/Bioconductor [GenomicAlignments] (Anders et al., 2015) considering only  
24 reads of lengths 18-24 nt. Read counts of transposable elements were retrieved from reads  
25 aligned to the antisense strand, while for all other features, reads mapping to the sense strand  
26 were counted. For quantifying mRNAs, featureCounts (Liao et al, 2014) was used counting  
27 uniquely mapped reads on both strands. For library size normalization and differential  
28 expression analysis the DESeq2 package (Love et al., 2014) was used independently for the  
29 small RNA and mRNA dataset. Genes with a false-discovery rate (termed p-value in the text)  
30 smaller than 0.00001 were regarded differentially expressed in the mRNA dataset comparing  
31 RKD2 to CIM calli. For Gene Ontology term analysis R/Bioconductor package 'goseq' was  
32 used with annotations from GoMapMan (Ramsak et al., 2014). Transcripts per million (TPMs)  
33 were calculated for all mRNA samples for gene expression level comparisons. To visualize  
34 them in heatmaps, we used logarithmized transcripts per million (TPM) plus a pseudocount



1 ( $\log_2[\text{TPM}+0.5]$ ), as these were approximately Gaussian distributed, and normalized for  
2 between-sample variation. Prediction of novel miRNAs was performed with miR-PREFeR, and  
3 predicted mature miRNAs were included in the annotation file (Lei & Sun, 2014).

#### 4 5 Prediction of small RNA targets

6 Target predictions for miRNAs identified in our small RNA libraries were performed with  
7 psRNAtarget ([http://plantgrn.noble.org/v1\\_psRNATarget/](http://plantgrn.noble.org/v1_psRNATarget/)) (Dai & Zhao, 2011). Information  
8 on validated targets for miRNAs was retrieved from a comprehensive list provided by Konika  
9 Chawla (<ftp://ftp.arabidopsis.org/home/tair/Genes/SmallRNAsCarrington/>) and from  
10 miRTarBase 7.0 (<http://mirtarbase.mbc.nctu.edu.tw/php/download.php>).

#### 11 12 (Quantitative) RT-PCR

13 For RT-PCR, fifteen isolated cells (egg cells and central cells, respectively) were pooled for  
14 mRNA isolation and cDNA synthesis as described previously (Sprunck et al., 2005). For  
15 quantitative PCR, total RNA was extracted from RKD2-induced callus and hormone-induced  
16 CIM callus as described above and treated with DNase I (Thermo Fisher Scientific). Poly(A)+  
17 RNA was isolated from 5  $\mu\text{g}$  total RNA using the Dynabeads<sup>®</sup> mRNA DIRECT<sup>™</sup> Purification  
18 Kit (Thermo Fisher Scientific) with Dynabeads Oligo(dT)<sub>25</sub>. SuperScript III Reverse  
19 Transcriptase (Thermo Fisher Scientific) was used for first-strand cDNA synthesis following  
20 the manufacturers' protocols with the addition of 1  $\mu\text{l}$  Oligo(dT)<sub>18</sub> primer and 1  $\mu\text{l}$  RiboLock<sup>™</sup>  
21 Ribonuclease Inhibitor (MBI Fermentas). For RT-PCR, 2  $\mu\text{l}$  of cDNA was used per reaction.  
22 For quantitative real time PCR 1  $\mu\text{l}$  of cDNA was used per reaction with 2x SYBR-Green  
23 Master Mix (Peqlab) on a Mastercycler ep realplex S (Eppendorf). *UBC* (AT5G25760) and  
24 *eIF4G* (AT3G60240) were used as reference genes. Primers are listed in Table S1. Triplicates  
25 of each sample were analyzed. The change of expression between two samples was determined  
26 by the  $2^{-\Delta\Delta\text{CT}}$  Method according to (Livak & Schmittgen, 2001).

#### 27 28 Whole-mount in situ hybridization (WISH)

29 WISH on unfertilized pistils was carried out according to Hejatko et al. (2006). PCR fragments  
30 covering 313 bp of the 3' region of *ENDOL7* (At1g79800) and 303 bp of the 3' region of *AGO1*  
31 (At1g48410) were amplified using primer pairs ENODL7\_F/ENODL7\_R and AGO1\_F/  
32 AGO1\_R, respectively, and cloned into pCR<sup>™</sup>II-TOPO (ThermoFisher). The coding  
33 sequences of *ASP* (At1g31450, 1338bp) and *SBT4.13* (At5g59120, 2196bp) were amplified  
34 from cDNA using primer pairs ASP\_F/ASP\_R and SBT4\_F/SBT4\_R, respectively, and cloned

1 into pENTR/D-TOPO (Thermo Fisher Scientific). Primers are listed in Table S1. Probes were  
2 synthesized using the DIG RNA Labeling Mix kit (Roche, Product No. 11175025910) with  
3 linearized plasmid as a template. Probes for *SBT4.13* and *ASP* were fragmented to 300 bp. For  
4 small RNA detection by WISH, miRCURY LNA<sup>TM</sup> enhanced probes were ordered from  
5 EXIQON and 5' DIG-labeled miRCURY LNA<sup>TM</sup> scramble-miR was used as negative control  
6 (Table S1). To prevent wash out of small RNAs from the sample an additional EDC-fixation  
7 step was carried out following company instructions (<http://www.exiqon.com/ls/documents/scientific/edc-based-ish-protocol.pdf>) and as described previously (Gosh Dastidar et al., 2016).  
8 For miRCURY LNA<sup>TM</sup> enhanced probes the hybridization and washing steps were carried out  
9 at 48°C with a probe concentration of 10-20 nM. Gene-specific probes were hybridized and  
10 washed at 55°C.  
11

12

### 13 Northern blots

14 Small RNAs were separated on 12% Polyacrylamid gels containing 7.5M Urea as previously  
15 described (Meister et al., 2004). After transfer to Hybond-N (Amersham Biosciences) and  
16 crosslinking with EDC (1-Ethyl-3-(3-dimethylaminopropyl) carbodiimide), membranes were  
17 probed with 5' ( $\gamma$ -<sup>32</sup>P)ATP end-labeled antisense oligonucleotides directed against the miRNA  
18 of interest. Northern blots were stripped and re-probed for U6 snRNA as loading control.  
19 Oligonucleotide sequences are listed in Table S1.  
20

21

### 21 Construction of Reporter Transgenes

22 For promoter-reporter constructs, the respective promoter regions were amplified from  
23 genomic DNA using Phusion DNA Polymerase (New England Biolabs) and promoter-specific  
24 primers (Table S1) and cloned into pENTR/D-TOPO (Thermo Fisher Scientific) to generate  
25 entry clones. The promoters were sequenced and subsequently recombined into a pGREEN II-  
26 based vector containing a Gateway<sup>®</sup> cassette in front of a nuclear localized 3xGFP sequence  
27 and a *NOS* transcriptional terminator (Takeda & Jürgens, 2007) using LR Clonase II (Thermo  
28 Fisher Scientific). Transgenic plants were generated by *Agrobacterium*-mediated  
29 transformation of inflorescences, after transferring the expression vectors into *Agrobacterium*  
30 GV3101 pMP90 pSOUP. Transgenic seedlings were selected with 200 mg/l glufosinate  
31 ammonium (BASTA<sup>®</sup>; Bayer Crop Science) supplemented with 0.1% Tween-3 to 5 days after  
32 germination. Pistils of transgenic plants were dissected as described (Sprunck et al., 2012) and  
33 analyzed for fluorescent reporter activity by confocal laser scanning microscopy (CSLM).  
34

## 1 Microscopy

2 Confocal laser scanning microscopy was performed on a Zeiss Axiovert 200M inverted  
3 microscope equipped with a confocal laser scanning module (LSM 510 META) and on an  
4 inverted Leica SP8 CLSM with HC PL APO CS2 2 40x/1.30 Oil and HC PL APO CS2 2  
5 63x/1.30 glycerol objectives, respectively. The 488 nm-argon laser line was used for excitation  
6 of GFP and emission was detected with a BP 505-550 filter (LSM550 META) and from 500 to  
7 535 nm by a hybrid detector (SP8), respectively. Cleared ovules were imaged with the Zeiss  
8 Axio Imager.M2 microscope with ApoTome.2 using a Plan-Apochromat 40x/1.4 NA oil DIC  
9 objective and differential interference contrast.

10

## 11 Data accessibility

12 RNA-seq data have been deposited in NCBI GEO (<https://www.ncbi.nlm.nih.gov/geo/>),  
13 accession number XXXXX. Arabidopsis egg cell RNA-seq data are also integrated in the open  
14 source web server CoNekT (Proost & Mutwil, 2018).

15

16

17

## 18 Results

### 19 Generation and characterization of RKD2-induced callus-like tissue

20 Kőszegi et al. (2011) showed that ectopic expression of the egg cell-specific transcription factor  
21 RKD2 in Arabidopsis induced the formation of proliferating tissue that adopted transcriptome  
22 features of the egg cell. We aimed to utilize a similar RKD2-induced callus as a tool to elucidate  
23 small RNA pathway components in the Arabidopsis egg cell. To ectopically express an RKD2-  
24 GFP fusion protein in transgenic seedlings, we cloned *RKD2-GFP* under control of the *CaMV*  
25 *35S* promoter (*35Sp:RKD2-GFP*). Proliferating cell masses occasionally appeared on the  
26 primary roots of transgenic seedlings around three weeks after germination on selection  
27 medium (Fig. 1A). Two independent RKD2-induced cell lines were propagated as calli on  
28 hormone-free selection medium (Fig. 1B). As a control tissue, we produced calli by cultivating  
29 root explants of Arabidopsis seedlings on callus-inducing medium (CIM) supplemented with  
30 auxin and cytokinin (Fig. 1C). Fluorescence of RKD2-GFP was regularly assessed in the  
31 RKD2-induced calli (Fig. 1D) and confocal laser scanning microscopy revealed that RKD2-  
32 GFP locates, like expected, to the nucleus (Fig. 1E). RT-PCRs were performed to detect  
33 transcripts of genes with known expression in the Arabidopsis egg cell, including *WOX2*  
34 (*WUSCHEL-related homeobox*) (Haecker et al., 2004), *ABI4* (*ABA INSENSITIVE 4*) (Wang et

1 al., 2010), *SLAH* (*SEVEN IN ABSENTIA Homolog*) and *DRP4A* (*DYNAMIN RELATED*  
2 *PROTEIN 4A*) (Köszegi et al., 2011). Expression of *At5g01150* was tested as this gene shares  
3 sequence similarity to the egg cell- and proembryo-specific cDNA clone EC1-4 from wheat  
4 (Sprunck et al., 2005). The presence of known egg cell transcripts in the RKD2-induced callus  
5 suggested egg cell-like features, whereas these transcripts were not detectable in the auxin- and  
6 cytokinin-induced control callus (CIM) (Fig. 1F). Notably, the two RKD2-induced cell lines  
7 exhibited stable growth and RKD2-GFP expression throughout years of culture on hormone-  
8 free selection medium.

9

## 10 RNA-Seq analysis of differentially expressed genes

11 To identify differentially expressed genes between the RKD2-induced callus and the CIM  
12 callus, three biological replicates for each callus type were used for RNA extraction, library  
13 preparation and Illumina Next-Generation Sequencing. After trimming, 52 to 63 million reads  
14 were retained per sample, of which between 93% and 96% were mapped by TopHat2 (Table  
15 S2). The total number of annotated genes in TAIR10.22 was 33,602, of which 24,928 remained  
16 after automatic independent filtering of low count genes by DESeq2. Pearson's correlation  
17 coefficients indicated that the differences between the two callus types were considerably larger  
18 than between the three biological replicates (Fig. S1). 6,137 genes with a log<sub>2</sub>-fold threshold  
19 of 2 and a false-discovery rate (multiple testing adjusted p-value) smaller than 0.00001 were  
20 considered differentially expressed in the RKD2-induced callus when compared with the CIM  
21 callus (Table S3). Among those, 2,895 genes were induced (log<sub>2</sub> FC ≥ 2) and 3,242 genes were  
22 repressed (log<sub>2</sub> FC ≤ -2) in the RKD2 callus. Fig. 2a shows a Mean-versus-Average (MA) plot,  
23 providing an overview of gene expression differences depending on mean gene expression  
24 levels in the RKD2 and CIM calli. Red dots indicate significant differentially expressed genes  
25 (DEGs) and individually labeled genes were used for subsequent data validation.

26

## 27 Confirmation of differential expression between RKD2 and CIM calli by quantitative 28 real-time RT-PCR analysis

29 Log<sub>2</sub> fold changes from RNA-Seq data were validated by real-time RT-PCR using new cDNA  
30 batches from the two callus types, with *UBC21* (*UBIQUITIN-CONJUGATING ENZYME 21*)  
31 and *eIF4G* (*EUKARYOTIC TRANSLATION INITIATION FACTOR 4G*) as reference genes for  
32 normalization. We selected 17 genes covering the entire spectrum of log<sub>2</sub> fold-changes in the  
33 RNA-Seq data and including genes with known roles in small RNA pathways (e.g., *AGOs*,  
34 *DCL*, *CHR40*), or with validated expression in the Arabidopsis egg cell (*EC1.5*) (Fig. 2b).

1 RKD2-induced expression was validated for *AGO5* (*ARGONAUTE 5*), *AGO9* (*ARGONAUTE*  
2 *9*), *CHR34* (*CHROMATIN REMODELING 34*), *CHR40* (*CHROMATIN REMODELING 40*),  
3 *ENODL7* (*EARLY NODULIN-Like 7*), *EC1.5* (*EGG CELL 1.5*), *NRPE5-L* (*NUCLEAR RNA*  
4 *POLYMERASE V subunit 5-Like*) and for the *SWIB/MDM2* family member At5g23480.  
5 Notably, the two chromatin-remodeling protein encoding genes *CHR34* and *CHR40* (also  
6 termed *CLASSY4*) were the only two family members with strong induction in the RKD2-  
7 induced callus, whereas others such as *CLASSY1* (*CHR38*), *BRM/CHR2* (*BRAHMA*),  
8 *PKL/CHR6* (*PICKLE*) and *SYD/CHR3* (*SPLAYED*) were repressed (Fig. S2a). Among all the  
9 plant-specific RNA polymerase Pol IV and Pol V subunits, *NRPE5-L* showed strongest  
10 induction in the RKD2-induced callus (Fig. S2b).

11 Likewise, significantly repressed genes in the RKD2-induced callus revealed a similar pattern  
12 in real-time RT-PCR, including *DCL2* (*DICER-LIKE 2*), the *ARGONAUTES* *AGO2*, *AGO3* and  
13 *AGO10*, and the strongly repressed *SCPL14* (*SERINE CARBOXYPEPTIDASE-Like 14*). *AGO7*  
14 and *AGO1*, *NOP56* (*NUCLEOLAR PROTEIN 56*), the BRCA1-A complex subunit BRE-like  
15 (At5g42470) and *SPDS2* (*SPERMINE SYNTHASE 2*) were neither in RNA-Seq data nor in real-  
16 time RT-PCR differentially expressed (Fig. 2c).

17

## 18 Expression of RKD2-induced genes in Arabidopsis ovules

19 RNA-Seq data were further validated by performing whole mount in situ hybridization (WISH)  
20 and promoter-reporter studies (Fig. 2c,d). WISH with mature Arabidopsis ovules revealed egg  
21 cell-specific expression of RKD2-induced *ASP* (*ASPARTYL PROTEASE*), *ENODL7* (log<sub>2</sub>FC  
22 of 10.6) and *SBT4.13* (*SUBTILASE 4.13*; log<sub>2</sub>FC of 3.37), whereas *AGO1* (log<sub>2</sub>FC of 0.41)  
23 showed a rather ubiquitous expression in the ovule (Fig. 2c). For promoter-reporter studies, a  
24 nuclear-localized 3xGFP reporter (NLS3xGFP) was expressed under control of selected  
25 promoter sequences in transgenic plants. At least five independent transgenic lines were  
26 investigated for GFP fluorescence by confocal laser scanning microscopy (Fig. 2d). Egg cell-  
27 specific reporter activity was observed when NLS3xGFP was expressed under control of the  
28 *AGO8* promoter (log<sub>2</sub>FC of 10.28) and the promoter of *At5g01150* (log<sub>2</sub>FC of 11.37), which  
29 encodes a Domain of Unknown Function 674 (DUF674) protein with sequence similarity to a  
30 wheat egg cell-expressed cDNA (Sprunck et al., 2005). The promoters of *AGO5* and *AGO9*  
31 revealed strong activity in the egg cell but were also active in the central cell, the antipodal cells  
32 and in the funiculus of mature ovules. The *AGO9* promoter was furthermore active in the  
33 chalazal nucellus of the ovule (Fig. 2d).

34

## 1 Differentially expressed genes in the RKD2-induced callus and in egg cells

2 To investigate the gene expression profile of Arabidopsis egg cells, we isolated living cells  
3 from the Arabidopsis female gametophyte by micromanipulation as previously described  
4 (Englhart et al., 2017). We used the egg cell marker line EC1.1p:NLS3xGFP to be able to  
5 identify egg cells after they had been released from ovules treated with cell wall-degrading  
6 enzymes (Fig. 3a). Three replicates of 25 to 30 pooled egg cells each were used for RNA  
7 extraction, followed by library preparation from poly(A)+ RNA and Illumina Next-Generation  
8 Sequencing. After trimming, 47 to 57 million reads were obtained per replicate of pooled egg  
9 cells (Table S2) and 20,148 genes had a mean TPM of at least 1 (Table S4).

10 Because of limited availability of egg cells, resulting in very low amounts of input RNA for  
11 sequencing, we had to use a different library preparation protocol than the one used for the CIM  
12 and RKD2-induced callus samples. To avoid artifacts when comparing sample groups, we  
13 performed differential expression analysis only for the comparison of RKD2-induced callus  
14 with CIM callus (Table S3). To compare the two callus types with the egg cell pools, we decided  
15 to not perform statistics because of the afore-mentioned issue, but only calculated transcripts  
16 per million (TPMs) to visualize differences in gene expression levels (Table S4).

17 In previous microarray-based expression studies, 99 genes were reported to be upregulated at  
18 least seven-fold in the RKD2-induced callus in comparison to seedlings and hormone-induced  
19 CIM callus, and were therefore considered as putative egg cell-specific genes (Kőszegi et al.,  
20 2011). We used these 99 genes to compare the three RNA-seq replicates of egg cells, RKD2-  
21 induced callus and hormone-induced CIM callus (Fig. S3). We furthermore added four *ECI*  
22 genes with known egg cell-specific expression to the analysis (Sprunck et al., 2012; Resentini  
23 et al., 2017), since only one *ECI* family member (*ECI.5*) was included. When we compared  
24 the gene expression profiles in the replicates generated from CIM and RKD2-induced calli,  
25 most TPMs were significantly higher in the RKD2-induced callus and therefore in line with the  
26 microarray-based expression data of Kőszegi et al. (2011). One exception was *CALS1*  
27 (*CALLOSE SYNTHASE 1*), which did not confirm the reported differential expression.  
28 However, the egg cell-specific genes *ECI.1*, *ECI.2*, *ECI.3* and *ECI.4* were not induced in the  
29 RKD2 callus. Furthermore, the embryo-expressed stem cell regulator *WUSCHEL* (*WUS*) and  
30 six other genes were RKD2-induced but not expressed in the egg cell RNA-seq libraries (Fig.  
31 S3). We therefore concluded that the RKD2-induced callus is not egg cell-like but rather adopts  
32 egg cell-related transcriptome features.

33

34 Expression of small RNA pathway genes in the egg cell-related callus and in egg cells

1 ARGONAUTES (AGOs) play a central role in RNA interference and microRNA pathways.  
2 When we compared mean expression values (average TPM, +/-SD) of the ten Arabidopsis  
3 AGOs we found *AGO5*, *AGO8* and *AGO9* to be specifically expressed both in egg cells and in  
4 egg cell-related RKD2 callus whereas they were absent in the CIM control callus (Fig. 3b),  
5 which is in line with our results obtained from real-time RT-PCR with the two callus tissues  
6 and promoter-reporter studies in Arabidopsis ovules (Fig. 2). Although the average TPM value  
7 for *AGO8* was very low, the presence of *AGO8* transcripts in egg cells was confirmed by RT-  
8 PCR (Fig. 3c). To investigate AGO expression in both female gametes we also included isolated  
9 central cells in our RT-PCR experiments. *AGO2*, *AGO6* and *AGO8* transcripts were only  
10 detected in egg cells, whereas amplification products for *AGO1*, *AGO4*, *AGO5*, *AGO7* and  
11 *AGO9* were detected in both female gametes (Fig. 3c). Inconclusive results were obtained for  
12 *AGO3* and *AGO10*, which were down-regulated in the egg cell-related callus and in egg cells  
13 (Fig. 2b; Fig. 4). Whereas no amplification products were obtained by RT-PCRs using isolated  
14 egg and central cells, egg cell RNA-seq data suggest presence of transcripts at least in the egg  
15 cell.

16 A more global view on genes known to be involved in small RNA pathways and their  
17 differences in expression levels is shown in Fig. 4. Beside above mentioned *AGO5* and *AGO9*,  
18 the histone deacetylase *HDA18* and a cluster of genes comprising components of the RNA-  
19 directed DNA methylation (RdDM) pathway showed higher expression levels both in egg cells  
20 and the egg cell-related RKD2 callus, whereas expression levels were lower in the CIM callus.  
21 These are genes encoding DRB3 (DOUBLE-STRANDED RNA BINDING 3), the chromatin  
22 remodeling factor CHR40/CLASSY4, the SGS3-like dsRNA-binding proteins FDM2 and  
23 FDM4 (FACTOR OF DNA METHYLATION 2 and 4), and the *de novo* methyltransferase  
24 DRM1 (DOMAINS REARRANGED METHYLTRANSFERASE 1) controlling the  
25 maintenance of CHH methylation. By contrast, genes encoding the DNA glycosylase/lyase  
26 ROS1 (REPRESSOR OF SILENCING 1), DRB5 (DOUBLE-STRANDED RNA BINDING 5)  
27 and CHR31/ CLASSY3 showed stronger expression levels in egg cells but not in the RKD2-  
28 induced callus (Fig. 4).

29

### 30 Expression of AGO proteins in the egg cell-related RKD2 callus

31 Stability and activity of small RNAs depend on AGO protein abundance. To test whether AGO  
32 expression in the egg cell-related callus is under translational control, we performed Western  
33 blot analyses with commercially available anti-AGO peptide antibodies and protein extracts  
34 from CIM callus, RKD2-induced callus and a set of sporophytic and reproductive tissues (leaf,

1 root, flower and silique). AGO1 and AGO2 proteins were abundantly present in both callus  
2 types and detectable in all other tested tissues. AGO4 immunosignals were strongest in flowers  
3 and equally present in CIM and RKD2-induced callus. Much weaker signals were obtained for  
4 AGO6 in all tissues, including CIM and RKD2-induced callus. AGO5 and AGO9 proteins were  
5 neither detected in CIM callus nor in leaves and roots but abundantly present in flowers, siliques  
6 and in the RKD2-induced callus (Fig. 5), demonstrating that both transcripts are efficiently  
7 translated into proteins in the egg cell-related callus.

8

### 9 **Small non-coding RNAs in the egg cell-related callus**

10 Since we proved AGO protein abundance and egg cell-related transcriptome features, we  
11 considered the RKD2-induced callus suitable to investigate its small RNA (sRNA) profile in  
12 comparison to that of the hormone-induced CIM callus. We prepared six small RNA libraries  
13 (each three biological replicates) using the same batches of total RNA that had been used for  
14 mRNA-Seq for Illumina sequencing. After trimming, between 26 and 29 million small RNA  
15 (sRNA) reads were obtained for each sample of the hormone-treated CIM callus, whereas  
16 between 17 and 20 million sRNA reads were retrieved for each of the egg cell-related RKD2  
17 callus samples (Table S2). For the CIM callus libraries, between 39 and 45% of the trimmed  
18 sRNA reads could be mapped uniquely to the Arabidopsis genome, and between 20 and 23%  
19 of the reads had multiple mapping locations. The libraries from the RKD2-induced callus  
20 contained between 8 and 12% reads which could be uniquely mapped, whereas between 30 and  
21 38% of the reads had multiple mapping locations. The lower percentage of uniquely mapped  
22 reads in the sRNA libraries from RKD2 callus tissue was mainly caused by a significantly  
23 higher number of sRNAs derived from repetitive elements (e.g., transposable elements), which  
24 mapped to multiple genomic positions. Both uniquely and multi-mapping reads were  
25 considered for sRNA expression analyses.

26 We restricted further analyses to reads with length 18-24 nt, to exclude reads that did not derive  
27 from small RNAs but from degradation products of longer RNA specimen. This reduced the  
28 number of input reads to 10 to 14 million reads for the CIM callus samples and 4 to 5 million  
29 reads for the RKD2 callus samples. Mapping rates were higher for this subset, with 48-49%  
30 unique mappings for CIM callus samples and 17-21% for RKD2 callus samples, respectively,  
31 and 36-37% multi-mapping reads for CIM callus samples, and 70-75% multi-mapping reads  
32 for RKD2 callus samples (Table S2).

33 To compare the relative abundance of read length across sRNA feature types, we calculated  
34 relative read counts (percentages) for each sample, and summarized biological replicates by



1 taking the median. The resulting profile of read length revealed that the majority of reads was  
2 either 21 nt or 24 nt long (Fig. 6a), which is in agreement with the miRNA and siRNA classes  
3 of small RNAs in Arabidopsis. However, 24-nt sRNAs were most abundant in the RKD2-  
4 induced callus, whereas the highest percentage of counts in the CIM callus comprised 21-nt  
5 sRNAs, likely reflecting stronger tendencies towards post-transcriptional silencing in the CIM  
6 callus and RNA-dependent DNA methylation in the egg cell-related callus, respectively. To  
7 functionally dissect the reads with specific lengths, we aligned them to the genomic features  
8 annotated in the TAIR database ([arabidopsis.org](http://arabidopsis.org)). Notably, the egg cell-related callus produced  
9 a proportionately higher number of transposable element (TE) sRNA counts (47% of all counts,  
10 versus 20% in CIM callus). TE-derived siRNAs were prominent among the 24 nt reads but also  
11 among the 21-nt and 22-nt long reads, indicating the posttranscriptional degradation of  
12 transposable elements activated in the egg cell-related callus.

13 Increased levels were furthermore obtained for 18, 19, 23 and 24 nt long reads originating from  
14 *tRNA* loci (10.8% of all counts in RKD2 callus, versus 0.7% in CIM callus) (Fig. 6a). On the  
15 other hand, the egg cell-related callus revealed reduced levels of miRNAs (19% of total reads  
16 versus 51% in CIM callus). A considerable fraction of reads with length 21 nt and longer  
17 aligned to protein-coding genes in the CIM callus, whereas in the RKD2 callus reads mapping  
18 to protein-coding regions were represented across the complete range of read lengths analyzed.  
19 However, the total number of reads aligned to protein-coding regions did not differ much  
20 between the two types of calli (18% in CIM callus versus 16% in RKD2 callus). These reads  
21 can stem from siRNAs targeted against protein-coding genes and from degradation products of  
22 protein-coding genes.

23

#### 24 Expression changes of TE sRNAs and miRNAs in the egg cell-related RKD2 callus

25 For differential expression analysis of small RNAs with DESeq2, we considered small RNA-  
26 seq reads of lengths 18 to 24 nt mapping to a genomic feature annotated in TAIR10.22 for  
27 library size normalization and focused on miRNAs and transposable element (TE)-derived  
28 small RNAs.

#### 29 *Small RNAs silencing transposable elements*

30 Small RNA read counts aligning to the antisense strand of TEs were investigated in more detail  
31 for their differential expression and distribution across TE families. Among the 1,463 *TE* loci  
32 with mapped sRNA reads, the majority (81.9%) was repressed in the RKD2 callus, suggesting  
33 that the corresponding siRNAs mediate transcriptional silencing to prevent deleterious  
34 reactivation of transposons (Fig.6b and Table S5). The largest groups among the repressed *TE*

1 were formed by *copia-like* long terminal repeat (LTR) retrotransposons and non-LTR  
2 retrotransposons (LINEs), followed by class II DNA transposons from the *CACTA*, *hAT*  
3 (*hobo/Ac/Tam3*)-like and *Mutator* superfamilies. Nevertheless, we also detected 265  
4 transcriptionally active *TE* loci with matching sRNA reads in the egg cell-related callus,  
5 matching with previous observations that reactivation of TEs occurs specifically during female  
6 and male gamete formation (Slotkin et al. 2009; Olmedo-Monfil et al., 2010). Notably, the  
7 majority (66%) of these induced *TE* loci belong to the *Gypsy-like* superfamily of long terminal  
8 repeat (LTR) retrotransposons and more than half of those were *Athila* LTRs (Fig.6b).

### 9 *miRNAs*

10 To quantify the differential expression of annotated and novel miRNAs, we substituted the  
11 miRNAs annotated in TAIR10.22 with Arabidopsis miRNAs from miRBase and predicted  
12 novel miRNAs using the miR-PREFeR prediction tool (Lei and Sun, 2014) before running  
13 DESeq2. Those miRNAs with annotated sequences in the miRBase sequence database  
14 (Kozomara and Griffiths-Jones, 2014) were referred to as “known”. Differential expression  
15 profiling of known miRNAs revealed clear differences between the egg cell-related RKD2  
16 callus and the hormone-induced CIM callus. In total, 96 known miRNAs were differentially  
17 regulated with a log<sub>2</sub> fold change of at least 2 (Table S6). Notably, the great majority of these  
18 miRNAs (88) showed reduced abundance in the RKD2 callus when compared with the control  
19 callus (Fig. S4), whereas only 9 miRNAs were induced. Considering -3p and -5p mature forms  
20 separately, the strongest induced miRNA in the RKD2 callus was miR172d-3p (log<sub>2</sub>FC of 9.2),  
21 followed by miR831-3p and miR866-5p (both log<sub>2</sub>FC of 6.1) (Fig.7a). Highest read counts in  
22 the RKD2 callus were derived for upregulated miR158a-5p (average counts 6,252; log<sub>2</sub>FC of  
23 4.5), miR866 (average counts 1,549; log<sub>2</sub>FC of 6.1), and miR5640 (average counts 1,615;  
24 log<sub>2</sub>FC of 3.7) (Table S6).

25 The strongest repressed miRNA was miR165b (log<sub>2</sub>FC of -14.52) with an average of 7,098  
26 counts in the CIM callus but no counts in the RKD2 callus. The most abundant miRNAs in the  
27 CIM callus were those derived from *MIR165* and *MIR166* loci (miR165a,b and 166a,c,f,g).  
28 Furthermore, miR157a,b,c (log<sub>2</sub>FC of -9.8 to -5.1), miR156a,c,d,e (log<sub>2</sub>FC of -9.4 to -3.7) and  
29 miR8167 (log<sub>2</sub>FC of -9.2 to -4.8) were among the strongest repressed miRNA in the CIM callus  
30 (Fig. S4 and Table S6).

31 Beside known miRNAs we identified 30 potential novel miRNAs which were differentially  
32 expressed. Comparisons of the genomic coordinates of these “novel” miRNAs with genomic  
33 coordinates of miRNAs in miRBase revealed that some of them correspond to stem-loop  
34 sequences of known MIR precursors but differ from known miRNAs derived from these stem

1 loops. In total, 20 differentially expressed novel miRNAs were linked to known MIR  
2 precursors, whereas 10 differentially expressed novel miRNAs mapped to new gene loci (Table  
3 S7). The differential expression of six selected known and novel miRNAs was successfully  
4 validated by Northern blot hybridization (Fig.7b).

5

### 6 Predicted and experimentally validated targets of differentially expressed miRNAs

7 The identification of target genes of the differentially expressed miRNAs was performed using  
8 the plant small RNA target analysis tool psRNAtarget. We then analyzed the differential  
9 expression of predicted targets in the RKD2-induced callus, particularly taking account of  
10 miRNA-targeted cleavage which should result in negatively correlated expression tendencies  
11 of the miRNA targets. Table 1 shows induced miRNAs in the egg cell-related callus, their  
12 predicted or experimentally validated targets and the changes in target gene expression in the  
13 RKD2-induced callus. Six *Arabidopsis* APETALA2-LIKE (AP2-like) transcription factors are  
14 known targets for miR172 (Aukerman and Sakai, 2003; Schmid et al., 2003; Mathieu et al.,  
15 2009). Two of them, SMZ (*SCHLAFMUTZE*) and TOE3 (*TARGET OF EARLY ACTIVATION*  
16 3), are validated targets of miR172d and their downregulation in the RKD2 callus suggests  
17 miR172d-induced cleavage of transcripts. Notably, we found miR845a to be upregulated in the  
18 RKD2 callus, although the miR845 family was reported to be preferentially expressed in mature  
19 *Arabidopsis* pollen (Creasey et al., 2014; Borges et al., 2018). The *Gypsy*-like retrotransposon  
20 *Athila* (AT1G43060) is a predicted target for miR845a-guided cleavage and its expression is  
21 downregulated in the RKD2 callus. Opposing expression tendencies were also obtained for  
22 targets predicted for the other seven RKD2-induced miRNAs (Table 1), and for targets of  
23 miRNAs which were strongly repressed in the RKD2 callus (Table S8).

24 Examples are targets for miR5653 (log<sub>2</sub>FC of -9.6), miR319b (log<sub>2</sub>FC of -8.4), miR159b (log<sub>2</sub>FC  
25 of -7.0), and miR781a,b (log<sub>2</sub>FC -2.4). Remarkably, miR5653 is predicted to target *ABI4* (*ABA*  
26 *INSENSITIVE 4*), which is strongly induced in the RKD2 callus (log<sub>2</sub>FC of 10.5; Fig. 2b) and  
27 shows egg cell-specific expression in mature ovules (Wang et al., 2010). The miR319 family is  
28 known to target *TCP* transcription factors and one validated target for miR319b is *TCP4*,  
29 exhibiting elevated expression in the RKD2 callus (log<sub>2</sub>FC of 4.4). Likewise, a known target  
30 for miR159b (*MYB101*) shows opposing expression in the RKD2 callus (log<sub>2</sub>FC of 4.1). One  
31 predicted target of miR781a,b encodes a SWIB/MDM2, Plus-3 and GYF domain-containing  
32 protein (At5g23480). Notably, At5g23480 is egg cell-expressed and strongly induced in the  
33 RKD2 callus (log<sub>2</sub>FC of 9.74), which was verified by real time RT-PCR (Fig. 2b). A

1 comprehensive overview on differentially expressed known and novel miRNAs, together with  
2 target predictions by psRNAtarget is given in Tables S8 to S10.

3

#### 4 Differentially expressed small non-coding RNAs in the female gametophyte

5 We performed small RNA whole mount *in situ* hybridization (WISH) with DIG-labeled locked  
6 nucleic acid (LNA) antisense probes to examine the spatial distribution of differentially  
7 expressed miRNAs in Arabidopsis Col-0 ovules (Fig. 8). In the sporophytic tissues of the ovule,  
8 RKD2-induced miR172c,d was detected in the inner integuments and the chalazal nucellus but  
9 not in the outer integuments. Within the female gametophyte, signals for miR172c,d were  
10 detectable in the nucleus and cytoplasm of egg cells, central cells, and synergid cells. A  
11 different pattern of expression was obtained for the other miRNAs. Whereas signals for RKD2-  
12 induced miR8176 especially accumulated in the nucleoli of egg cells, synergid cells and central  
13 cells, miR5640 was detected in the nucleus and cytoplasm of the egg cell and the two synergid  
14 cells. Faint miR5640 signals were also detectable in the nucleus of the central cell. Within the  
15 female gametophyte, novel miR\_95 (log<sub>2</sub>FC of 1.6 in the RKD2-induced callus) was detected  
16 in the egg cell, the two synergid cells and the central cells. Furthermore, novel miR\_95 was  
17 detectable in sporophytic cells, specifically in inner and outer integument cells forming the  
18 micropyle of the ovule.

19 Surprisingly, the RKD2-induced miR845a-3p, previously reported to be preferentially  
20 expressed in pollen (Borges et al., 2018), showed very strong signals in the two synergid cells,  
21 weaker signals in the egg cell and either no, or very faint signals in the central cell. Since the  
22 *Arabidopsis* ecotype Landsberg erecta (Ler-0) has a 1kb deletion at the *MIR845a* locus (Borges  
23 et al., 2018), we concomitantly performed WISH with ovules from this ecotype. We did not  
24 detect any signals in the cells of the Ler-0 female gametophyte, arguing for the specificity of  
25 the probe directed against miR845a-3p (Fig. 8).

26 We also included WISH experiments with miRNAs which were repressed in the RKD2 callus  
27 (Fig. 8; up in CIM callus). Indeed, the isoforms of miR390 and miR166, both strongly repressed  
28 in the RKD2-induced callus (log<sub>2</sub>FC of -8.9 to -6.0 for miR390b,c and log<sub>2</sub>FC of -9.7 to -9.1  
29 for miR166c,f,g, respectively), have not been detected in egg cells. However, these miRNAs  
30 showed a synergid-specific expression within the female gametophyte and exhibited a polar  
31 distribution towards their micropylar pole. Notably, we also detected signals of miR390b,c and  
32 miR166c,f,g in the micropyle of the ovule, suggesting them to be secreted by the synergid cells.

33

34

## 1 Discussion

2 Members of the plant-specific RWP-RK DOMAIN CONTAINING (RKD) family of  
3 transcription factors have a conserved role as egg cell determinants in Arabidopsis and  
4 *Marchantia polymorpha* (Köszegi et al., 2011; Koi et al., 2016; Rövekamp et al., 2016). In  
5 Arabidopsis, five *RKD* genes are expressed during distinct stages of embryo sac development,  
6 with *RKD1* and *RKD2* being highly expressed in egg cells (Tedeschi et al., 2017). *RKD2* was  
7 reported to induce cell proliferation and the activation of egg-like transcriptomic features when  
8 ectopically expressed in seedlings, protoplasts, or in sporophytic cells of the ovule (Köszegi et  
9 al., 2011; Lawit et al., 2013). We analyzed the transcriptome of own *RKD2*-induced cell lines  
10 in comparison to that of a hormone-induced CIM callus and found, with one exception, all  
11 putative egg cell-specific genes that have been reported by Köszegi et al. (2011) to be  
12 differentially upregulated in the *RKD2*-induced callus.

13 We complemented the transcriptome data with RNA-Seq data generated from isolated  
14 Arabidopsis egg cells and found a largely overlapping expression pattern of genes which are  
15 induced in both the egg cell and the *RKD2* callus, including *AGOs* and known or, so far,  
16 unexplored chromatin regulators. These include, for example, histone deacetylase *HDA18*  
17 which might act, like *HDA6*, in RNA directed DNA methylation, the chromatin remodeling  
18 factors *CHR34* and *CHR40/CLASSY4*, a *SWIB/MDM2* family member encoded by *At5g23480*  
19 and the *POL V subunit 5-like* protein which might all fulfill specific functions in the egg cell.  
20 Nevertheless, we also found differences between the *RKD2*-induced callus and the egg cell  
21 transcriptome since, for example the embryo-expressed stem cell regulator *WUSCHEL (WUS)*  
22 is induced in the *RKD2* callus although not expressed in the egg cell, whereas four of the five  
23 egg cell-specific *EC1* genes were not *RKD2*-induced. These variations in expression suggest  
24 that certain aspects of the egg cell transcriptome are activated in the *RKD2*-induced callus  
25 rather than all transcriptome features of the egg cell.

26 Gamete development is controlled by unique gene expression programs and involves epigenetic  
27 reprogramming of histone modifications and DNA methylation (Jullien & Berger, 2010;  
28 Baroux et al., 2011). However, demethylation and removal of repressive histone marks render  
29 the genome particularly susceptible to increased TE mobilization. In animals, the PIWI/piRNA  
30 pathway targets reactivated TEs post-transcriptionally and through the induction of epigenetic  
31 changes at the loci from which they are expressed (Russell & LaMarre, 2018). Although  
32 flowering plant genomes lack the germline-expressed Piwi subfamily of Argonautes and  
33 piRNAs, certain plant AGOs are preferentially expressed in their reproductive cell lineages  
34 (Grimson et al., 2008; Borges and Martienssen, 2015). In rice, mutations in the AGO5 homolog

1 *MEIOSIS ARRESTED AT LEPTOTENE 1 (MEL1)* induce precocious meiotic arrest and male  
2 sterility, due to defects in large-scale meiotic chromosome reprogramming and histone  
3 hypermethylation (Nonomura et al., 2007; Liu et al., 2016). Maize AGO9 is expressed in ovule  
4 somatic cells surrounding the megaspore mother cell (female meiocyte) and contributes to non-  
5 CG DNA methylation in heterochromatin. Furthermore, chromosome segregation is arrested  
6 during meiosis in maize *ago9* mutants (Singh et al., 2011). In Arabidopsis, at least two small  
7 RNA-mediated silencing pathways appear to act in somatic cells flanking the megaspore  
8 mother cell and the functional megaspore (haploid product of meiosis) to regulate female  
9 reproductive development. One pathway depends on AGO9 and 24 nt siRNAs to prevent sub-  
10 epidermal somatic cells from adopting megaspore-like cell identity (Olmedo-Monfil et al.,  
11 2010), whereas a second, independent small RNA-mediated pathway acts in the functional  
12 megaspore to promote the transition to megagametogenesis (Tucker et al., 2012).  
13 However, *ago9* mutants of maize and Arabidopsis imply divergent mechanisms: Arabidopsis  
14 AGO9 represses meiocyte cell fate in somatic cells (Olmedo-Monfil et al., 2010), while maize  
15 AGO9 inhibits somatic cell fate in meiocytes (Singh et al., 2011). Moreover, the impact of  
16 small noncoding RNAs on chromatin changes, the transcriptional landscape and cell identity of  
17 egg cells is not yet explored. Our small RNA-seq data revealed that the egg cell-related callus  
18 is highly enriched in TE-derived small RNAs, whereas the ratio of miRNAs is decreased when  
19 compared with the hormone-induced CIM callus. Most of the TE loci aligning with the small  
20 RNA reads are downregulated. However, 265 TEs with mapped reads were transcriptionally  
21 active and they mainly belong to the *Gypsy-like/Athila* superfamily of LTRs. It will remain an  
22 interesting task for the future to identify genic mRNAs targeted by the TE-derived siRNAs, as  
23 they might be involved in regulating egg cell fate. Furthermore, AGO5 and AGO9 are translated  
24 into proteins in the RKD2-induced callus. The egg cell-related callus therefore represents a  
25 unique tool to overcome cell material limitations for protein biochemistry, which will allow the  
26 purification and analysis of bound small RNAs in an egg cell-related background.

27 During Arabidopsis male gametophyte development, several TEs were reported to be less  
28 methylated in the pollen vegetative cell due to reduced expression of DDM1 (DECREASE IN  
29 DNA METHYLATION1), and, thus, transiently reactivated. As consequence, miRNA-  
30 mediated post-transcriptional gene silencing of reactivated TEs generates 21-nt epigenetically  
31 expressed siRNAs (easiRNAs), which are transferred from the vegetative cell nucleus to the  
32 sperm cells to reinforce silencing of complementary TEs and to protect the male gametes  
33 (Slotkin et al., 2009; Creasey et al. 2014). In the female gametophyte, a similar scenario was  
34 proposed based on the observation that the central cell undergoes active DNA demethylation

1 before fertilization, resulting in TE reactivation. Small RNA movement is also assumed  
2 between the central and the egg cell, based on the observation that an artificial microRNA,  
3 expressed in the central cell, targets cleavage of green fluorescent protein (GFP) RNA  
4 expressed in the egg cell (Ibarra et al., 2012).

5 Notably, our results from small RNA WISH with *Arabidopsis* ovules showed that most of the  
6 RKD2-induced miRNAs were also detectable in egg cell. One exception was miR158a-5p,  
7 which could not be detected in the ovule whereas signals were obtained in cells of the RKD2  
8 callus (not shown). For the other miRNAs, signals were either detectable in egg cells, synergids  
9 and central cells, or in egg cells and synergids. Of special interest was miR845a which was  
10 reported to be preferentially pollen expressed and to target transposable elements (Borges et  
11 al., 2018). WISH signals for miR845a were much stronger in the synergid cells than in egg cells  
12 and could indicate that *MIR845a* is strongly expressed in the accessory synergid cells and  
13 moved to the egg cell to silence reactivated transposable elements in the female gamete.  
14 Intercellular communication of the synergid cells with the egg cell via small RNAs has not yet  
15 been reported and will be interesting to study in more detail in the future.

16 On the other hand, two CIM-induced miRNAs (miR166 and miR390) were detectable in  
17 synergid cells but not in egg cells. Interestingly, these miRNAs accumulated in a polar fashion  
18 at the micropylar pole of synergid cells and were also detectable in the micropylar channel that  
19 is formed by the integuments of the ovule. Synergid cells are regarded as glandular-like cells  
20 that play an active role in secretion. They are the sources of pollen tube attraction signals  
21 essential for gametophytic pollen tube guidance (Higashiyama et al., 2001). In dicot plant  
22 species such as *Torenia* and *Arabidopsis*, defensin-like CRPs known as LUREs are secreted by  
23 the synergids as species-specific pollen tube attractants (Okuda et al., 2009; Kanaoka et al.,  
24 2011; Takeuchi & Higashiyama, 2012), whereas in maize the secreted EGG APPARATUS1  
25 (*ZmEA1*) peptide acts as pollen tube attractant (Márton et al., 2005, 2012). Beside pollen tube  
26 attraction, synergid cells are also required for pollen tube reception, which involves elaborate  
27 communication between the pollen and the receptive synergid cell resulting in pollen tube burst  
28 and degeneration of the receptive synergid (Dresselhaus et al., 2016; Higashiyama & Yang  
29 2017). The detection of miR166 and miR390 in *Arabidopsis* synergid cells and the secretion of  
30 these miRNAs into the micropyle suggests hitherto undescribed roles for these accessory cells  
31 in secreting small noncoding RNAs, most likely to act in intercellular communication with the  
32 arriving pollen tube, or in pathogen defense.

33

34

## 1 **References**

- 2 **Allen E, Xie Z, Gustafson AM, Carrington JC. 2005.** microRNA-directed phasing during trans-acting  
3 siRNA biogenesis in plants. *Cell* **121**: 207-221.
- 4 **Anders S, Pyl PT, Huber W. 2015.** HTSeq - a Python framework to work with high-throughput  
5 sequencing data. *Bioinformatics* **31**: 166-169.
- 6 **Aukermann MJ, Sakai H. 2003.** Regulation of flowering time and floral organ identity by a MicroRNA  
7 and its APETALA2-like target genes. *Plant Cell* **15**: 2730-2741.
- 8 **Axtell MJ. 2014.** Butter: high-precision genomic alignment of small RNA-seq data. *bioRxiv*  
9 10.1101/007427.
- 10 **Baroux C, Raissig MT, Grossniklaus U. (2011).** Epigenetic regulation and reprogramming during  
11 gamete formation in plants. *Current Opinion in Genetics & Development* **21**: 124–133.
- 12 **Bolger AM, Lohse M, Usadel B. 2014.** Trimmomatic: a flexible trimmer for Illumina sequence data.  
13 *Bioinformatics* **30**: 2114-2120.
- 14 **Borges F, Martienssen RA. 2015.** The expanding world of small RNAs in plants. *Nat. Rev. Mol. Cell*  
15 *Biol.* **16**: 727–741.
- 16 **Borges F, Parent J-S, van Ex F, Wolff P, Martínez G, Köhler C, Martienssen RA. 2018.**  
17 Transposon-derived small RNAs triggered by miR845 mediate genome dosage response in  
18 *Arabidopsis*. *Nature Genetics* **50**: 186–192.
- 19 **Brennecke J, Aravin AA, Stark A, Dus M, Kellis M, Sachidanandam R, Hannon GJ. 2007.** Discrete  
20 small RNA-generating loci as master regulators of transposon activity in *Drosophila*. *Cell* **128**:  
21 1089-1103.
- 22 **Clough SJ, Bent AF. 1998.** Floral dip: a simplified method for *Agrobacterium*-mediated transformation  
23 of *Arabidopsis thaliana*. *Plant Journal* **16**: 735–743.
- 24 **Creasey KM et al. 2014.** miRNAs trigger widespread epigenetically activated siRNAs from  
25 transposons in *Arabidopsis*. *Nature* **508**: 411–415.
- 26 **Dai X, Zhao PX. 2011.** psRNATarget: a plant small RNA target analysis server. *Nucleic Acids Res* **39**:  
27 W155-159.
- 28 **Dresselhaus T, Sprunck S, Wessel G. 2016.** Fertilization mechanisms in flowering plants. *Current*  
29 *Biology* **26**: R125-R139.
- 30 **Drews GN, Koltunow A. 2011.** The *Arabidopsis* book, the female gametophyte. *American Society of*  
31 *Plant Biologists* **9**: e0155.
- 32 **Englhart M, Šoljić L, Sprunck S. 2017.** Manual isolation of living cells from the *Arabidopsis thaliana*  
33 female gametophyte by micromanipulation. Anja Schmidt (ed.), *Plant Germline Development:*  
34 *Methods and Protocols, Methods in Molecular Biology* Vol. **1669**.
- 35 **Feng X, Qi Y. 2016.** RNAi in Plants: An Argonaute-Centered View. *Plant Cell* **28**: 272–285.
- 36 **Ghosh DM, Mosiolek M, Bleckmann A, Dresselhaus T, Nodine MD, Maizel A. 2016.** Sensitive  
37 whole mount in situ localization of small RNAs in plants. *Plant Journal* **88**, 694–702.



- 1 **Grimson A, Srivastava M, Fahey B, Woodcroft BJ, Chiang HR, King N, Degnan BM, Rokhsar**  
2 **DS, Bartel DP. 2008.** Early origins and evolution of microRNAs and Piwi-interacting RNAs in  
3 animals. *Nature* **455**, 1193–1197.
- 4 **Haecker A, Gross-Hardt R, Geiges B, Sarkar A, Breuninger H, Herrmann M, Laux T. 2004.**  
5 Expression dynamics of WOX genes mark cell fate decisions during early embryonic patterning in  
6 *Arabidopsis thaliana*. *Development* **131**: 657-668.
- 7 **Hejatko J, Blilou I, Brewer PB, Friml J, Scheres B, Benkova E. 2006.** In situ hybridization technique  
8 for mRNA detection in whole mount *Arabidopsis* samples. *Nat Protoc* **1**: 1939-1946.
- 9 **Higashiyama T, Yabe S, Sasaki N, Nishimura Y, Miyagishima S, Kuroiwa H, Kuroiwa T. 2001.**  
10 Pollen tube attraction by the synergid cell. *Science* **293**: 1480-1483.
- 11 **Higashiyama T, Yang WC. 2017.** Gametophytic Pollen Tube Guidance: Attractant Peptides, Gametic  
12 Controls, and Receptors. *Plant Physiol.* **173**: 112-121.
- 13 **Ibarra CA, Feng X, Schoft VK, Hsieh TF, Uzawa R, Rodrigues JA, Zemach A, Chumak N,**  
14 **Machlicova A, Nishimura T, Rojas D, Fischer RL, Tamaru H, Zilberman D. 2012.** Active DNA  
15 demethylation in plant companion cells reinforces transposon methylation in gametes. *Science* **337**,  
16 1360–1364.
- 17 **Ingouff M, Rademacher S, Foo SH, Šoljić L, Readshaw A, Holec S, Xin N, Lahouze B, Sprunck S,**  
18 **Berger F. (2010).** Zygotic resetting of the HISTONE 3 variant repertoire participates in epigenetic  
19 reprogramming in *Arabidopsis*. *Curr. Biol.* **20**: 2137-2143.
- 20 **Jullien PE, Berger F. (2010).** DNA methylation reprogramming during plant sexual reproduction?  
21 *Trends in Genetics* **26**: 394-399.
- 22 **Kanaoka MM, Kawano N, Matsubara Y, Susaki D, Okuda S, Sasaki N, Higashiyama T. 2011.**  
23 Identification and characterization of TcCRP1, a pollen tube attractant from *Torenia concolor*. *Ann*  
24 *Bot.* **108**: 739-747.
- 25 **Karimi M, Inze D, Depicker A. 2002.** GATEWAY vectors for *Agrobacterium*-mediated plant  
26 transformation. *Trends Plant Sci* **7**: 193-195.
- 27 **Kersey PJ, Allen JE, Christensen M, Davis P, Falin LJ, Grabmueller C, Hughes DS, Humphrey**  
28 **J, Kerhornou A, Khobova J, et al. 2014.** Ensembl Genomes 2013: scaling up access to genome-  
29 wide data. *Nucleic Acids Res* **42** (Database issue): D546-552.
- 30 **Kim D, Perteza G, Trapnell C, Pimentel H, Kelley R, Salzberg SL. 2013.** TopHat2: accurate  
31 alignment of transcriptomes in the presence of insertions, deletions and gene fusions. *Genome Biol*  
32 **14**: R36.
- 33 **Koi S, Hisanaga T, Sato K, Shimamura M, Yamato KT, Ishizaki K, Kohchi T, Nakajima K. 2016.**  
34 An evolutionarily conserved plant RKD factor controls germ cell differentiation. *Current Biology*  
35 **26**: 1–7.

- 1 **Közegi D, Johnston AJ, Rutten T, Altschmied L, Kumlehn J, Wüst SEJ, Kirioukhova O,**  
2 **Gheyselinck J, Grossniklaus U, Bäumlein H. 2011.** Members of the RKD transcription factor  
3 family induce an egg cell-like gene expression program. *Plant Journal* **67**: 280–291.
- 4 **Kozomara A, Griffiths-Jones S. 2014.** miRBase: annotating high confidence microRNAs using deep  
5 sequencing data. *Nucleic Acids Res.* **42**(Database issue): D68-73.
- 6 **Lawit SJ, Chamberlin MA, Agee A, Caswell ES, Albertsen MC. 2013.** Transgenic manipulation of  
7 plant embryo sacs tracked through cell-type specific fluorescent markers: cell labeling, cell ablation,  
8 and adventitious embryos. *Plant Reproduction* **26**: 125–137.
- 9 **Lei J, Sun Y. 2014.** miR-PREFeR: an accurate, fast and easy-to-use plant miRNA prediction tool using  
10 small RNA-Seq data. *Bioinformatics* **30**:2837-2839.
- 11 **Liao Y, Smyth GK, Shi W. 2014.** featureCounts: an efficient general purpose program for assigning  
12 sequence reads to genomic features. *Bioinformatics* **30**: 923-930.
- 13 **Liu H, Nonomura KI. 2016.** A wide reprogramming of histone H3 modifications during male meiosis  
14 I in rice is dependent on the Argonaute protein MEL1. *J Cell Sci.* **129**: 3553-3561.
- 15 **Livak KJ, Schmittgen TD. 2001.** Analysis of relative gene expression data using real-time quantitative  
16 PCR and the 2(-Delta Delta C(T)) Method. *Methods* **25**: 402-408.
- 17 **Love MI, Huber W, Anders S. 2014.** Moderated estimation of fold change and dispersion for RNA  
18 seq data with DESeq2. *Genome Biology* **15**: 550–571.
- 19 **Márton ML, Cordts S, Broadhvest J, Dresselhaus T. 2005.** Micropylar pollen tube guidance by egg  
20 apparatus 1 of maize. *Science* **307**: 573-576.
- 21 **Márton ML, Fastner A, Uebler S, Dresselhaus T. 2012.** Overcoming hybridization barriers by the  
22 secretion of the maize pollen tube attractant ZmEA1 from Arabidopsis ovules. *Curr Biol.* **22**: 1194-  
23 1198.
- 24 **Mathieu J, Yant LJ, Murdter F, Kuttner F, Schmid M. 2009.** Repression of flowering by the miR172  
25 target SMZ. *PLoS Biol* **7**: e1000148.
- 26 **Meister G, Landthaler M, Patkaniowska A, Dorsett Y, Teng G, Tuschl T. 2004.** Human Argonaute2  
27 mediates RNA cleavage targeted by miRNAs and siRNAs. *Mol Cell* **15**: 185-197.
- 28 **Nonomura KI. 2018.** Small RNA pathways responsible for non-cell-autonomous regulation of plant  
29 reproduction. *Plant Reprod.* **31**:21-29.
- 30 **Nonomura K, Morohoshi A, Nakano M, Eiguchi M, Miyao A, Hirochika H, Kurata N. (2007)** A  
31 germ cell specific gene of the ARGONAUTE family is essential for the progression of premeiotic  
32 mitosis and meiosis during sporogenesis in rice. *Plant Cell* **19**: 2583–2594.
- 33 **Okuda S, Tsutsui H, Shiina K, Sprunck S, Takeuchi H, Yui R, Kasahara RD, Hamamura Y,**  
34 **Mizukami A, Susaki D, Kawano N, Sakakibara T, Namiki S, Itoh K, Otsuka K, Matsuzaki M,**  
35 **Nozaki H, Kuroiwa T, Nakano A, Kanaoka MM, Dresselhaus T, Sasaki N, Higashiyama T.**  
36 **(2009).** Defensin-like polypeptide LUREs are pollen tube attractants secreted from synergid cells.  
37 *Nature* **458**: 357 – 361.

- 1 **Olmedo-Monfil V, Duran-Figueroa N, Arteaga-Vazquez M, Demesa-Arevalo E, Grimanelli D,**  
2 **Slotkin RK, Martienssen RA, Vielle-Calzada JP. 2010.** Control of female gamete formation by  
3 small RNA pathway in Arabidopsis. *Nature* **464**: 628–632.
- 4 **Pagnussat GC, Alandete-Saez M, Bowman JL, Sundaresan V. 2009.** Auxin-dependent patterning  
5 and gamete specification in the Arabidopsis female gametophyte. *Science* **324**: 1684–1689.
- 6 **Proost S, Mutwil M. 2018.** CoNekT: an open-source framework for comparative genomic and  
7 transcriptomic network analyses. *Nucleic Acids Res* **46**: W133-W140.
- 8 **Ramsak Z, Baebler S, Rotter A, Korbar M, Mozetic I, Usadel B, Gruden K. 2014.** GoMapMan:  
9 integration, consolidation and visualization of plant gene annotations within the MapMan ontology.  
10 *Nucleic Acids Res* **42**: D1167-1175.
- 11 **Resentini F, Cyprys P, Steffen JG, Alter S, Morandini P, Mizzotti C, Lloyd A, Drews GN,**  
12 **Dresselhaus T, Colombo L, Sprunck S, Masiero S. 2017.** SUPPRESSOR OF FRIGIDA (SUF4)  
13 Supports Gamete Fusion via Regulating Arabidopsis EC1 Gene Expression. *Plant Physiol.* **173**:  
14 155-166.
- 15 **Rojas-Ríos P, Simonelig M. 2018.** piRNAs and PIWI proteins: regulators of gene expression in  
16 development and stem cells. *Development* **145**: dev161786. doi: 10.1242/dev.161786.
- 17 **Rouget C, Papin C, Boureux A, Meunier AC, Franco B, Robine N, Lai EC, Pelisson A, Simonelig**  
18 **M. 2010.** Maternal mRNA deadenylation and decay by the piRNA pathway in the early Drosophila  
19 embryo. *Nature* **467**: 1128-1132.
- 20 **Rövekamp M, Bowman JL, Grossniklaus U. 2016.** Marchantia MpRKD regulates the gametophyte–  
21 sporophyte transition by keeping egg cells quiescent in the absence of fertilization. *Current Biology*  
22 **26**: 1–8.
- 23 **Russell SJ, LaMarre J. 2018.** Transposons and the PIWI pathway: genome defense in gametes and  
24 embryos. *Reproduction* **156**: R111–R124.
- 25 **Schmid M, Uhlenhaut NH, Godard F, Demar M, Bressan R, Weigel D, Lohmann JU. 2003.**  
26 Dissection of floral induction pathways using global expression analysis. *Development* **130**: 6001–  
27 6012.
- 28 **She W, Baroux C. 2015.** Chromatin dynamics in pollen mother cells underpin a common scenario at  
29 the somatic-to-reproductive fate transition of both the male and female lineages in *Arabidopsis*.  
30 *Front. Plant Sci.* **6**: 294 <https://doi.org/10.3389/fpls.2015.00294>
- 31 **Singh M, Goel S, Meeley RB, Dantec C, Parrinello H, Michaud C, Leblanc O, Grimanelli D. 2011.**  
32 Production of viable gametes without meiosis in maize deficient for an ARGONAUTE protein.  
33 *Plant Cell* **23**: 443–458.
- 34 **Skinner DJ, Sundaresan V. 2018.** Recent advances in understanding female gametophyte  
35 development. *F1000Research* 2018, **7** (F1000 Faculty Rev): 804.

- 1 **Slotkin RK, Vaughn M, Borges F, Tanurdzi M, Becker JD, Feijó JA, Martienssen RA. 2009.**  
2 Epigenetic reprogramming and small RNA silencing of transposable elements in pollen. *Cell* **136**:  
3 461-472.
- 4 **Smyth DR, Bowman JL, Meyerowitz EM. 1990.** Early flower development in *Arabidopsis*. *Plant Cell*  
5 **2**: 755–767.
- 6 **Sprunck S, Baumann U, Edwards K, Langridge P, Dresselhaus T. 2005.** The transcript composition  
7 of egg cells changes significantly following fertilization in wheat (*Triticum aestivum* L.). *Plant*  
8 *Journal* **41**: 660-672.
- 9 **Sprunck S, Rademacher S, Vogler F, Gheyselinck J, Grossniklaus U, Dresselhaus T. 2012.** Egg  
10 cell-secreted EC1 triggers sperm cell activation during double fertilization. *Science* **338**: 1093-1097.
- 11 **Takada S, Jürgens G. 2007.** Transcriptional regulation of epidermal cell fate in the Arabidopsis  
12 embryo. *Development* **134**: 1141-1150
- 13 **Takeuchi H, Higashiyama T. 2012.** A species-specific cluster of defensin-like genes encodes diffusible  
14 pollen tube attractants in Arabidopsis. *PLoS Biol.* **10**: e1001449.
- 15 **Tedeschi F, Rizzo P, Rutten T, Altschmied L, Bäumllein H. 2017.** RWP-RK domain-containing  
16 transcription factors control cell differentiation during female gametophyte development in  
17 Arabidopsis. *New Phytologist* **213**: 1909–1924.
- 18 **Tucker MR, Okada T, Hu Y, Scholefield A, Taylor JM, Koltunow AMG. (2012)** Somatic small  
19 RNA pathways promote the mitotic events of megagametogenesis during female reproductive  
20 development in Arabidopsis. *Development* **139**: 1399-1404.
- 21 **Vagin VV, Sigova A, Li C, Seitz H, Gvozdev V, Zamore PD. 2006.** A distinct small RNA pathway  
22 silences selfish genetic elements in the germline. *Science* **313**, 320-324.
- 23 **Wang D, Zhang C, Hearn DJ, Kang IH, Punwani JA, Skaggs MI, Drews GN, Schumaker KS,**  
24 **Yadegari R. 2010.** Identification of transcription-factor genes expressed in the Arabidopsis female  
25 gametophyte. *BMC Plant Biol.* **10**: 110.
- 26 **Yadegari R, Drews GN. 2004.** Female gametophyte development. *Plant Cell* **16**: 133–141.

27

28

1 **Author contributions**

2 S.S. conceived the project, J.E. conceived the bioinformatics analyses. M.U., A.B., M.L., C.M.,  
3 T.H. and S.S. performed experiments and analyzed the data, C.M. generated the small RNA-  
4 Seq data. N.S., M.E. and J.E. analyzed the RNA-Seq data. T.D. contributed reagents and  
5 analysis tools. S.S. prepared the figures and wrote the manuscript, with input from J.E., M.U.  
6 and T.D.

7

8 **Acknowledgements**

9 Illumina deep sequencing was carried out at the genomics core facility Center of Excellence for  
10 Fluorescent Bioanalytics (KFB, University of Regensburg, Germany). We thank Ingrid Fuchs  
11 and Monika Kammerer for their support in tissue culture, Lucija Šoljić for cell isolation and  
12 RT-PCR, Nicole Spitzlberger for helping with WISH experiments and Ning Xia with miRNA  
13 Northern blots, respectively. This work was supported by the Collaborate Research Centers  
14 SFB960, funded by the German Research Foundation (DFG).

15

16

17

18

1 **Supplemental Material**

2

3

4 **Supplemental Figures**

5

6 **Figure S1** Pearson's correlation between samples.

7 **Figure S2** Expression analysis of gene family members encoding Chromatin-remodeling  
8 factors and plant-specific RNA polymerase Pol IV and Pol V subunits.

9 **Figure S3** Heatmap of egg cell-specific and putative egg cell-specific genes.

10 **Figure S4** Log<sub>2</sub>-fold changes of miRNAs which are repressed in the RKD2 egg cell-like  
11 callus when compared with the CIM callus.

12

13

14 **Supplemental Tables**

15

16 **Table S1** List of Oligonucleotides.

17 **Table S2** Alignment Information for mRNA and small RNA reads from CIM and RKD2-  
18 induced callus and for mRNA reads from isolated egg cells.

19 **Table S3** Differential expression analysis of RNA-seq data generated from RKD2-induced  
20 callus and CIM control callus.

21 **Table S4** Transcripts per million (TPMs) of the two callus types compared with the egg cell

22 **Table S5** Differential expression of TE sRNA targeted transposable elements and distribution  
23 across TE families.

24 **Table S6** Differentially expressed known miRNAs in the RKD2-induced callus.

25 **Table S7** Differentially expressed novel miRNAs.

26 **Table S8** Target prediction and target gene expression of differentially expressed miRNAs in  
27 the RKD2-induced callus in comparison to the control callus (CIM).

28 **Table S9** Differentially in the RKD2-induced callus expressed novel miRNAs with known  
29 MIR precursors and their potential target, predicted by psRNAtarget.

30 **Table S10** Differentially in the RKD2-induced callus expressed novel miRNAs and their  
31 potential target, predicted by psRNAtarget.

32

33

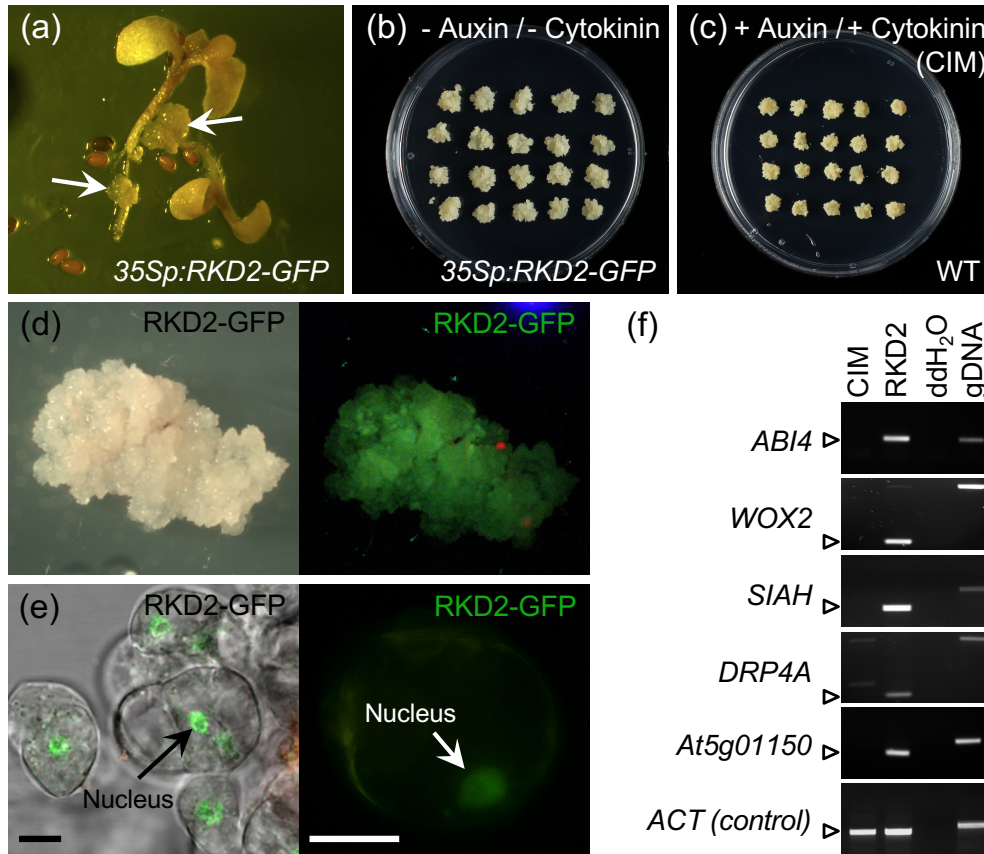

**Fig. 1** Generation of RKD2-induced egg cell-like callus. (a) Germinated Arabidopsis seedlings, transgenic for *35Sp:RKD2-GFP*. Callus-like cell masses (arrows) are visible at the primary roots of transgenic seedlings. (b) RKD2-induced cell line, propagated as calli on hormone-free medium. (c) Control calli, derived from seedling root segments cultured on callus induction medium (CIM) supplemented with auxin and cytokinin. (d) Bright field and fluorescence image of an egg cell-like callus expressing RKD2-GFP. (e) Cell cluster and single cell from RKD2-induced callus, with green fluorescence of RKD2-GFP in the nucleus. (f) Validation of egg cell-like cell fate by RT-PCR, using primer pairs specific for known egg cell-expressed genes. Abbreviations: *ABI4*, *ABA INSENSITIVE 4*; *WOX2*, *WUSCHEL-related homeobox 2*; *SIAH*, *SEVEN IN ABSENTIA Homolog*; *DRP4A*, *DYNAMIN RELATED PROTEIN 4A*. Size bars, 10  $\mu$ m.

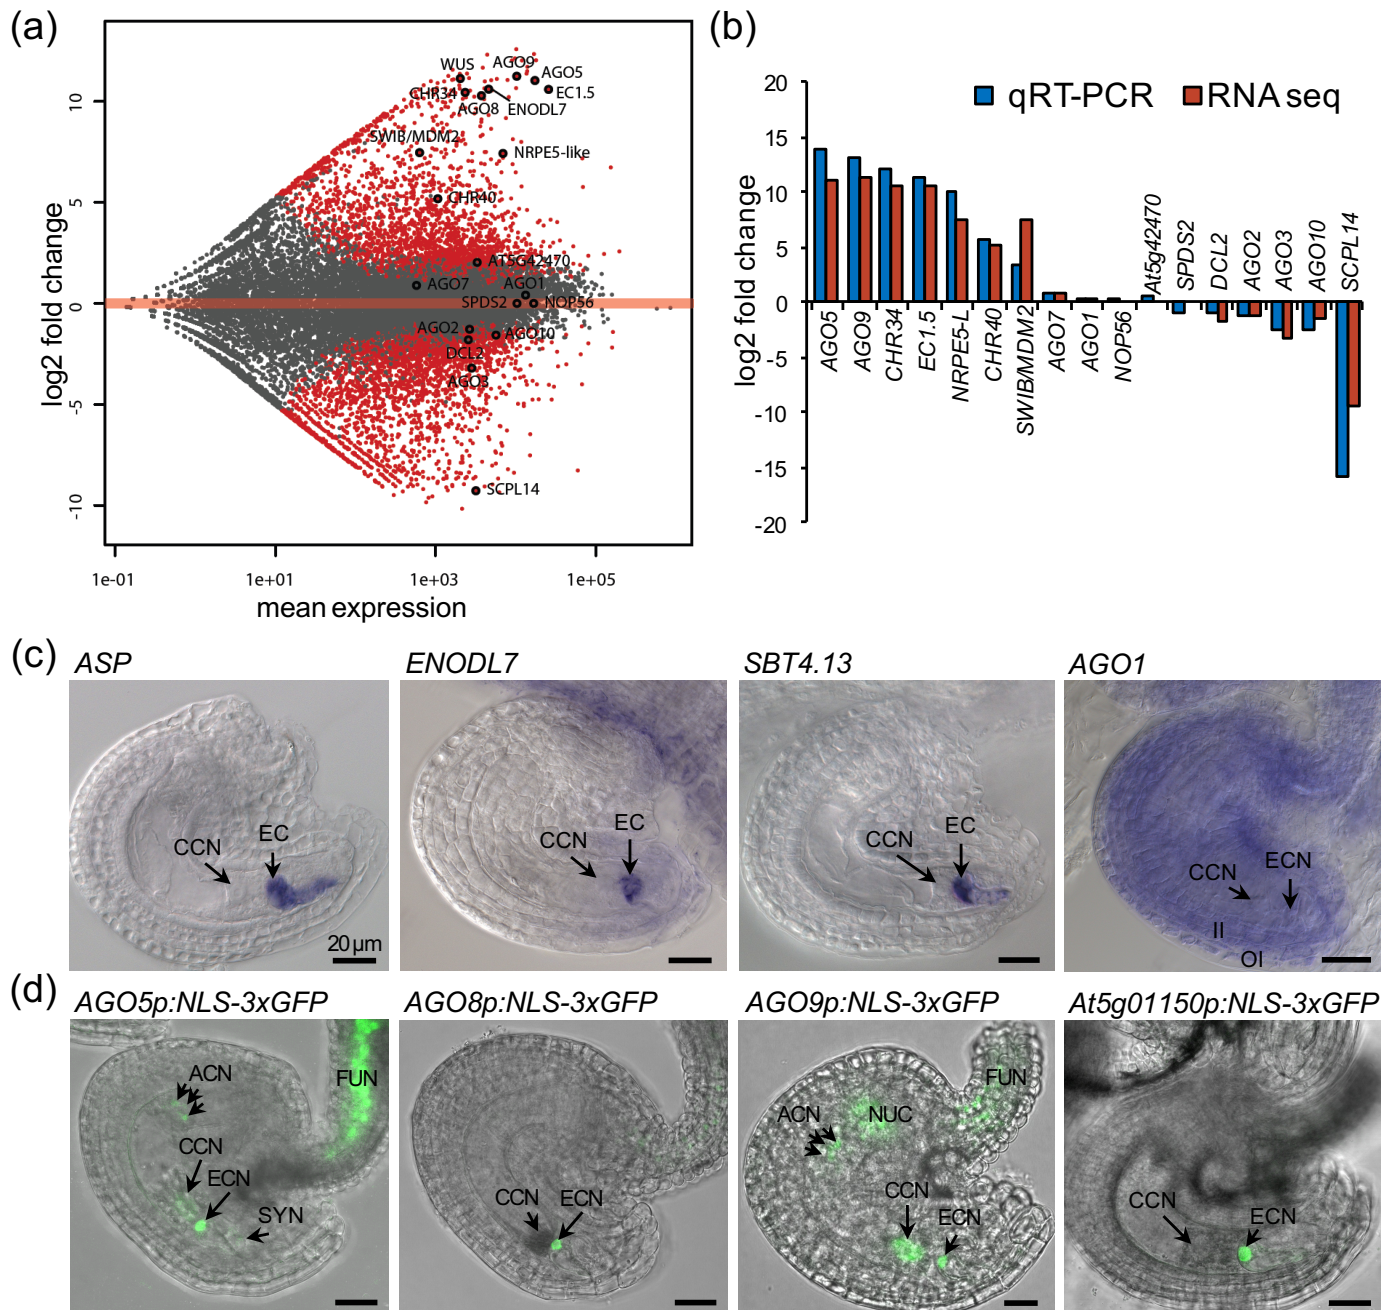

**Fig. 2** Analysis and validation of RNA-Seq data. (a) Mean-versus-Averages (MA) plot for differential expression analysis. Three RNA-Seq data sets for the RKD2-induced callus and the auxin-induced control callus (CIM), respectively, were analyzed. Each gene is represented with a dot. Genes with a False Discovery Rate (FDR) below  $1 \times 10^{-5}$  are shown in red. The horizontal axis shows the average expression over all samples; the Y axis indicates log<sub>2</sub> fold changes between the RKD2-induced and the control callus. (b) Expression studies using real-time PCR, compared with RNA-Seq-based log<sub>2</sub> fold changes. (c) Whole mount *in situ* hybridization using mature *Arabidopsis* ovules. Antisense probes are directed against mRNAs from RKD2-induced genes (*ASP*, *ENODL7*, *SBT4.13*) and *AGO1*, which is not differentially expressed. (d) Promoter-reporter studies. The nuclear localized GFP reporter (NLS-3xGFP) is expressed under control of promoters from genes with strong induction in the RKD2-induced callus. Merged fluorescence and brightfield CLSM images of mature ovules, prepared from transgenic plants, are shown. Abbreviations: ACN, antipodal cell nuclei; CCN, central cell nucleus; Chz, chalazal nucellus; EC, egg cell; ECN, egg cell nucleus; Fun, funiculus, II, inner integument; OI, outer integument. Size bars, 20 μm.



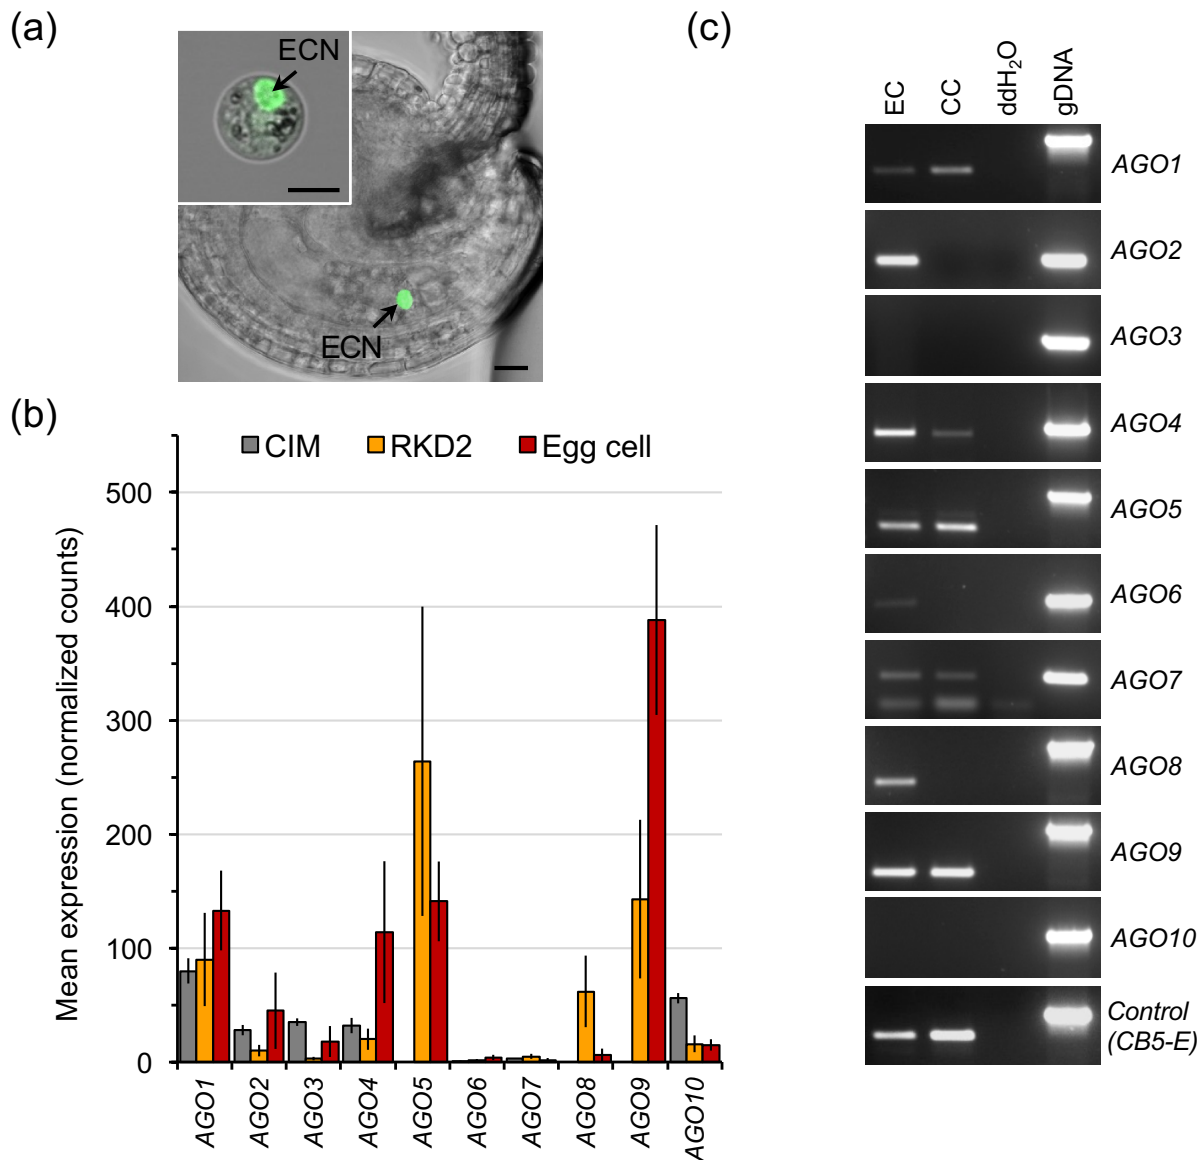

**Fig. 3** ARGONAUTE expression in egg cells. (a) Unfertilized ovule of Arabidopsis marker line EC1.1p:NLS3xGFP with green fluorescent egg cell nucleus (ECN). Inset in (a) shows an isolated egg cell of this marker line. Size bars, 10  $\mu$ m. (b) Mean expression values for the ten Arabidopsis AGOs in the control callus (CIM), the RKD2-induced callus, and in egg cells. Expression levels are shown as average TPM (+/- SD). (c) RT-PCR with cDNA generated from each ten isolated Arabidopsis egg cells and central cells, respectively. Gene-specific AGO primers were used and *CB5-E* served as reference. Genomic DNA was amplified as positive control. Abbreviations: CC, central cell; EC, egg cell; ECN, egg cell nucleus; gDNA, genomic DNA.

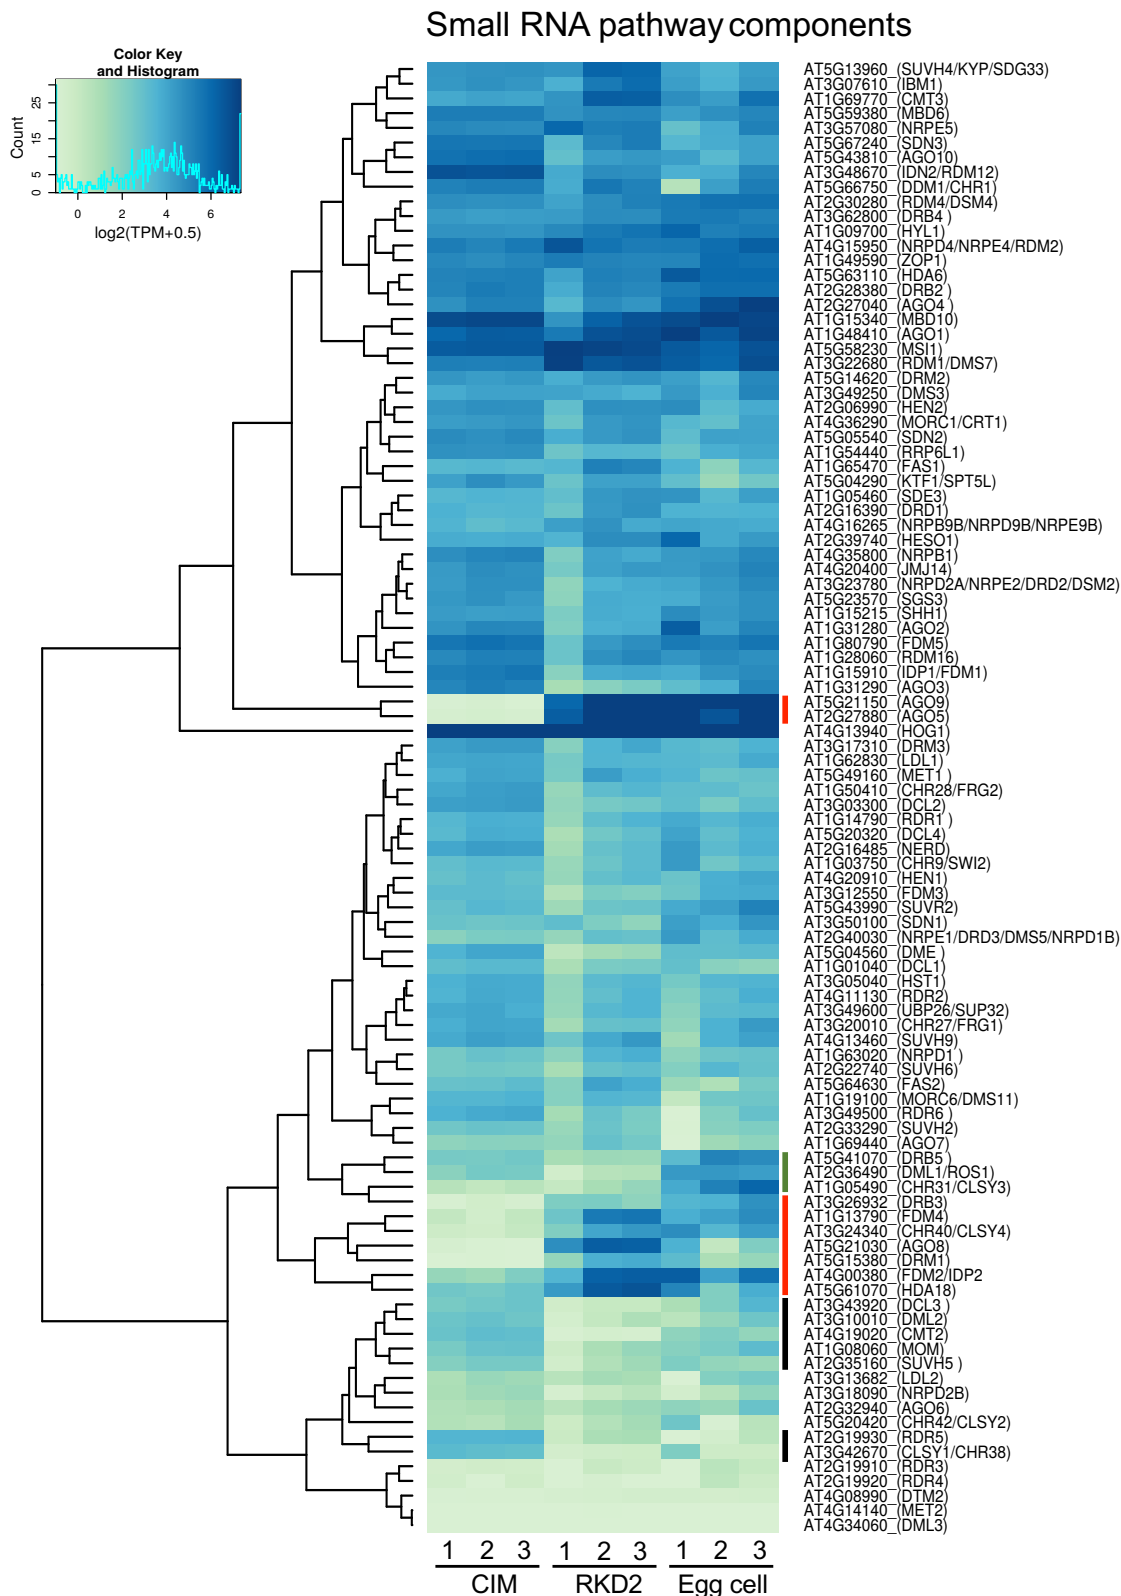

**Fig. 4** Expression pattern of genes known to be involved in small RNA pathways. The heatmap shows expression levels in the three biological replicates of hormone-induced control callus (CIM), RKD2-induced egg cell-like callus, and isolated egg cells. Color key indicates normalized and rlog transformed TPM values. Red bars label gene clusters with stronger expression levels both in egg cells and egg cell-like callus. Black bars label gene clusters with decreased expression in RKD2 callus and egg cells. Green bar labels genes with higher expression levels in egg cells but not RKD2 callus. Expression data of the genes shown in this figure are provided in Table S4.

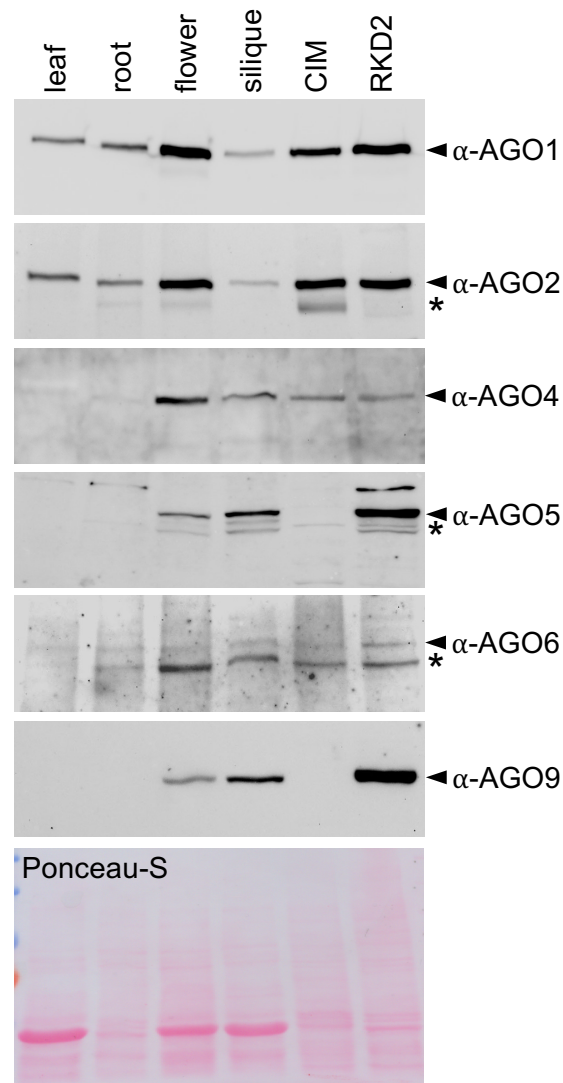

**Fig. 5** Western blot analyses showing ARGONAUTE (AGO) protein expression in the RKD2-induced egg cell-related callus, in the auxin-induced control callus (CIM), and in sporophytic and reproductive tissues of Arabidopsis. Six commercially available peptide antibodies were used, directed against AGO proteins as specified. Arrowheads label immunosignals matching with calculated and previously reported molecular weights. Asterisks mark putative degradation products. 20  $\mu$ g total protein extract was loaded on each lane. Ponceau-S staining is shown as loading control.

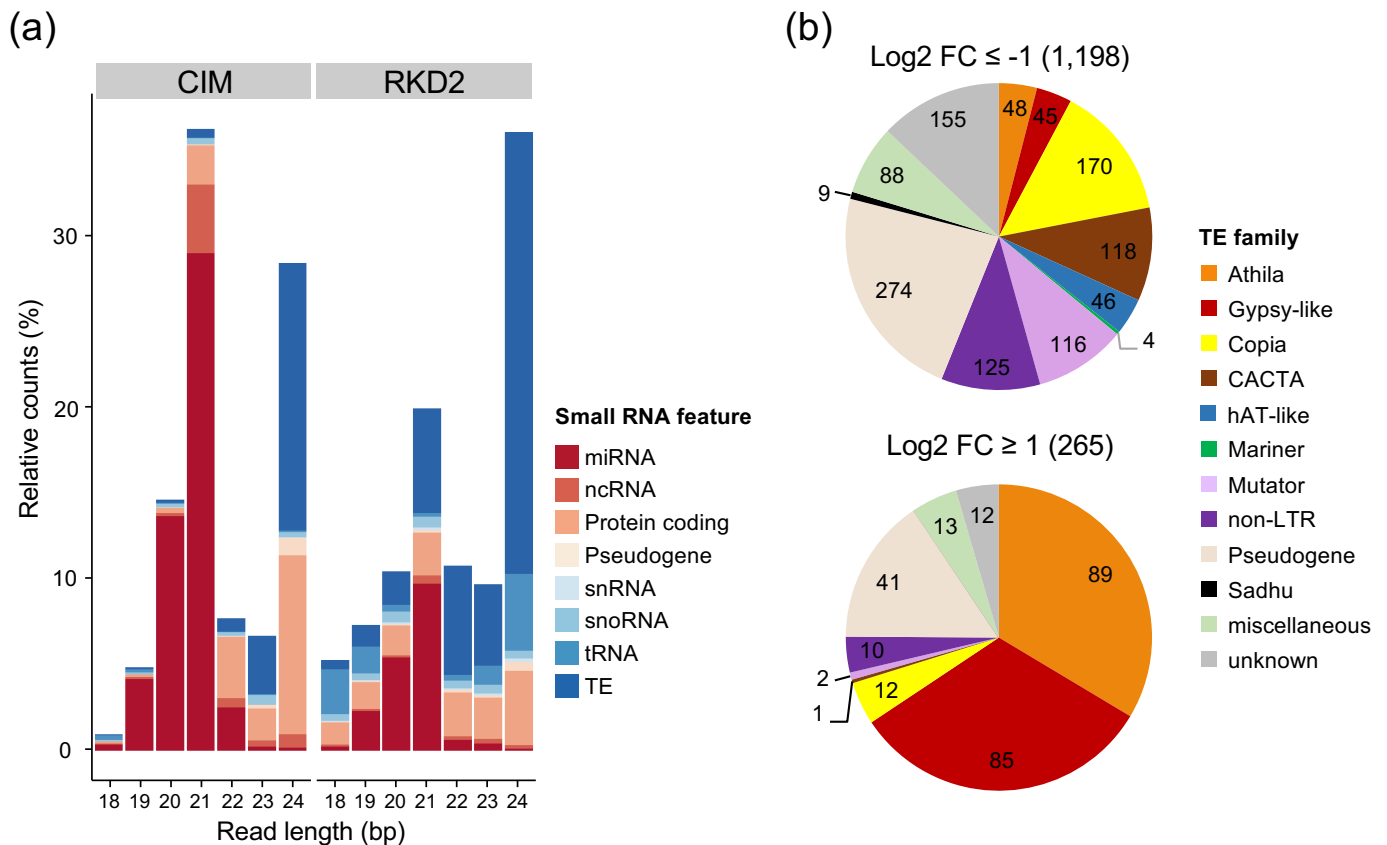

**Fig.6** Differentially expressed small noncoding RNAs in the two distinct callus types, analyzed by small RNA sequencing. (a) Distribution of small RNA reads from RKD2 and CIM calli into different lengths and genomic features. Small RNA reads were classified by length and alignment position within genomic features as annotated in TAIR10. Genomic features comprise microRNA (miRNA), non-coding RNA (ncRNA), protein coding gene, pseudogene, small nuclear RNA (snRNA), small nucleolar RNA (snoRNA), transfer RNA (tRNAs) and transposable element (TE). For each read length, the read distribution into genomic features was calculated relative to all reads ranging from 18 to 24 nt and aligning to any of the features mentioned above. Note the decreased percentages of reads aligning to *miRNA* loci and the increased percentages of 20 to 24 bp reads aligning to *TE* loci in the RKD2-induced callus. (b) Differentially expressed *TE* genes with mapped small RNA reads in the RKD2 callus and their distribution across *TE* families. Numbers correspond to genes with mapped small RNA reads which were either induced ( $\log_2 FC \geq 1$ ;  $P < 0.0001$ ) or repressed ( $\log_2 FC \leq -1$ ;  $P < 0.0001$ ) in the RKD2-induced callus in comparison with the CIM callus. Genes annotated as *transposable\_element\_gene* were grouped in miscellaneous, unknown, or pseudogene TEs according to additional informations. Numbers in brackets represent total number of *TE* gene loci.

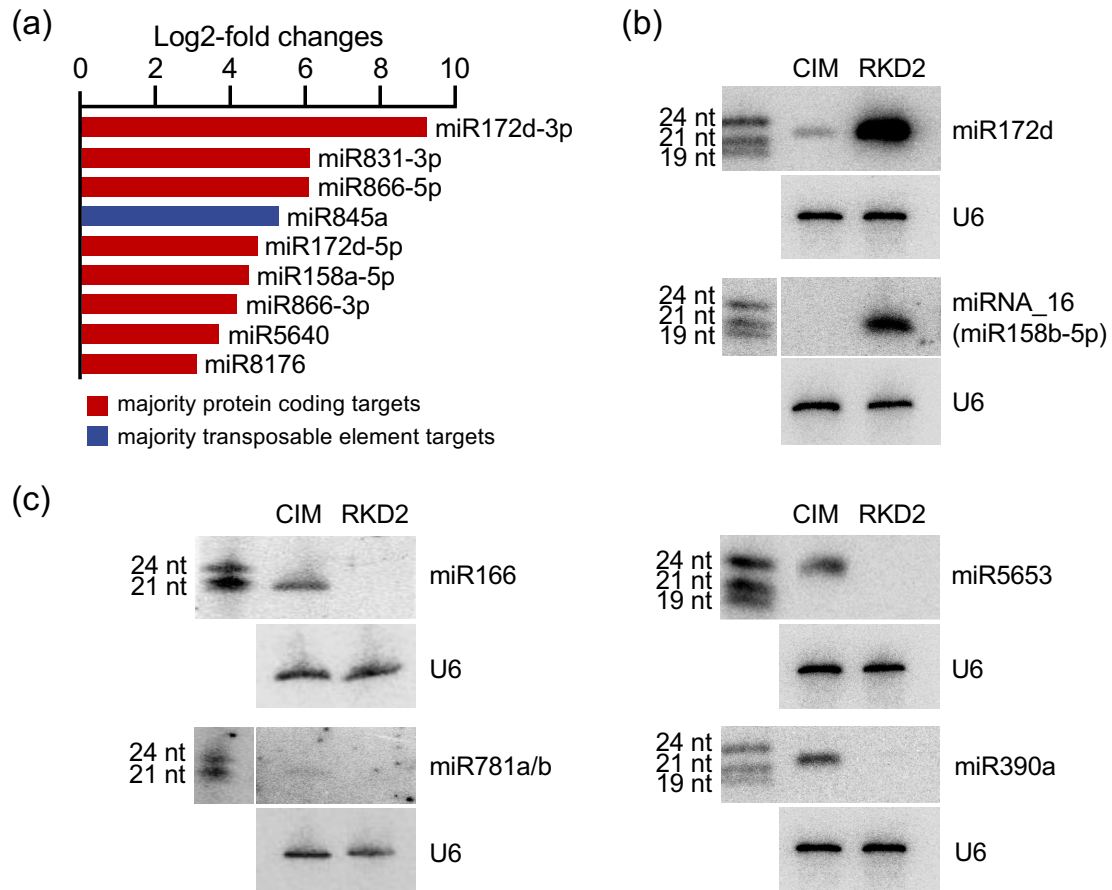

**Fig. 7** Differentially expressed miRNAs. (a) Log2-fold changes of induced miRNAs in the RKD2 egg cell-like callus. Bar colors are based on miRNA targets being mostly protein-coding genes (red) or transposable elements (blue) in plant small RNA target analysis (psRNATarget). Repressed miRNAs are shown in Fig. S4. (b), (c) Validation of differentially expressed miRNAs by Northern blot hybridization. Total RNA from RKD2-induced callus (RKD2) and hormone-induced control callus (CIM) was used for hybridization with probes directed against miRNAs with induced (b) or repressed (c) expression in the RKD2 callus. Northern blots were stripped and reprobed for U6 snRNA as loading control. The position of RNA size markers, electrophoresed on the same gel, is shown to the left of the blots. Log2-fold changes of repressed miRNAs in the RKD2 egg cell-like callus are shown in Fig. S4.

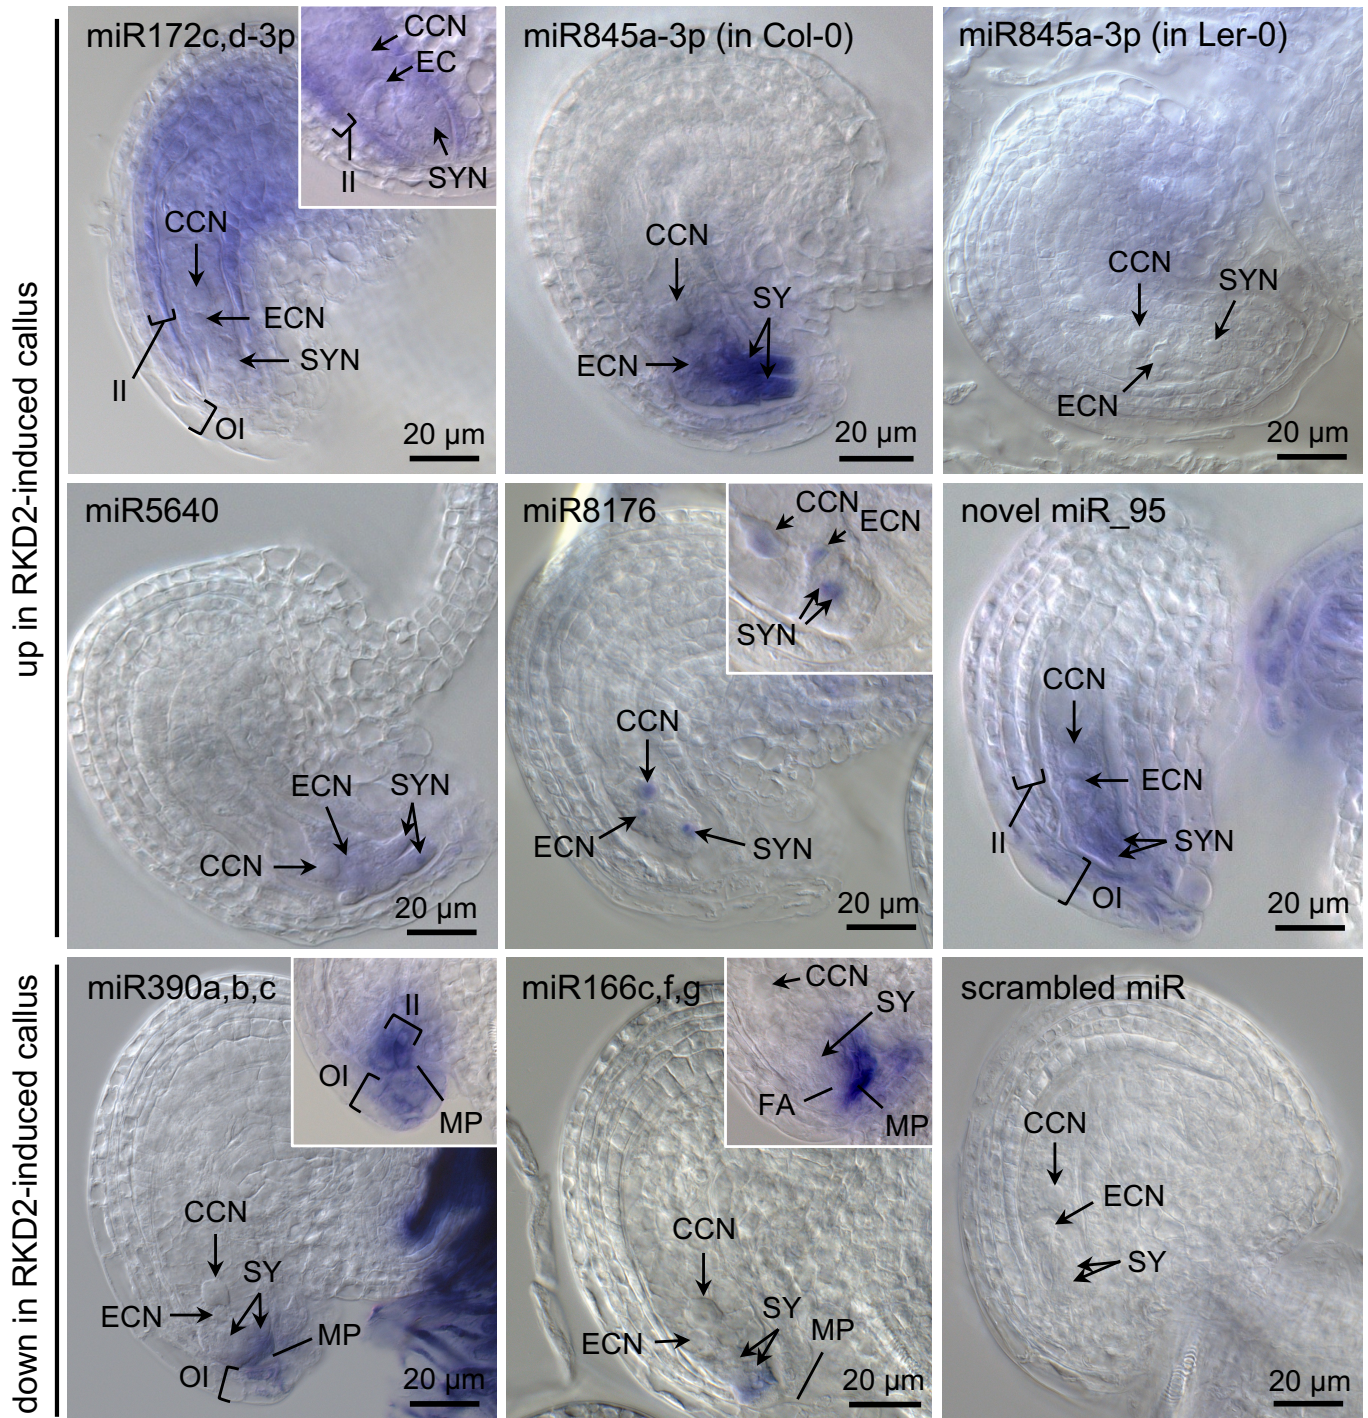

**Fig. 8** Localization of differentially expressed miRNAs in Arabidopsis ovules by whole mount in situ hybridization (WISH). MirCURY LNA™ detection probes were used for hybridization. When a probe can detect more than one miRNA isoform, this is indicated by the name (e.g., miR172c,d-3p). Insets show the micropylar region of another representative ovule hybridized with the same probe. WISH with scrambled miR, performed in parallel, served as control. Note that miR845a-3p is not detected in the female gametophyte of ecotype Landsberg erecta (Ler-0), which has a 1kb deletion at the *MIR845a* locus. All other ovules are of ecotype Columbia (Col-0). Abbreviations: CCN, central cell nucleus; EC, egg cell; ECN, egg cell nucleus; FA, filiform apparatus; II, inner integument; MP, micropyle; OI, outer integument; SY, synergid cell; SYN, synergid cell nucleus. Size bars, 20 μm.

**Table 1.** Target prediction for differentially upregulated miRNAs and target gene expression in the RKD2-induced callus.

| miRNA name | log2FC miRNA <sup>1</sup> | target accession | log2FC target | p/v <sup>2</sup> | Inhibition  | target symbol | target name / target family                                                  |
|------------|---------------------------|------------------|---------------|------------------|-------------|---------------|------------------------------------------------------------------------------|
| miR172d-3p | 9.2                       | AT3G54990        | -4.2          | v                | cleavage    | SMZ           | SCHLAFMUTZE/Apetala2-like transcription factor                               |
|            |                           | AT5G67180        | -2.9          | v                | cleavage    | TOE3          | Target of early activation tagged (EAT) 3/Apetala2-like transcription factor |
|            |                           | AT3G47360        | -3.4          | p                | cleavage    | HSD3          | Hydroxysteroid dehydrogenase 3                                               |
|            |                           | AT5G12900        | -2.5          | p                | cleavage    |               | DNA double-strand break repair RAD50 ATPase                                  |
| miR831-3p  | 6.1                       | AT1G69220        | -1.7          | p                | cleavage    | SIK1          | Serine/threonine kinase 1 (Hippo/STE20 homolog)                              |
|            |                           | AT5G10320        | -3.4          | p                | cleavage    |               | ATP synthase subunit B                                                       |
|            |                           | AT1G63100        | -3.4          | p                | cleavage    |               | GRAS family transcription factor                                             |
|            |                           | AT2G43445        | -4.2          | p                | cleavage    |               | F-box and associated interaction domains-containing protein                  |
| miR866-5p  | 6.1                       | AT5G06510        | -3.0          | p                | cleavage    | NF-YA10       | Nuclear Factor Y, subunit A10                                                |
| miR845a    | 5.3                       | AT1G43060        | -2.7          | p                | cleavage    |               | gypsy-like retrotransposon family (Athila)                                   |
| miR172d-5p | 4.7                       | AT1G70782.1      | -2.1          | p                | cleavage    | CPuORF28      | Conserved Peptide upstream Open Reading Frame 28                             |
|            |                           | AT3G23810        | -3.0          | p                | cleavage    | SAHH2         | S-adenosyl-l-homocysteine (SAH) hydrolase 2                                  |
| miR158a-5p | 4.5                       | AT1G79680        | -3.9          | p                | translation | WAKL10        | WALL ASSOCIATED KINASE-LIKE 10                                               |
|            |                           | AT1G55970        | -1.7          | p                | cleavage    | HAC4          | Histone acetyltransferase of the CBP family 4                                |
| miR866-3p  | 4.2                       | AT3G05380        | -1.9          | p                | cleavage    | ALY2          | ALWAYS EARLY 2 Myb-DNA binding factor                                        |
|            |                           | AT4G20110        | -2.4          | p                | cleavage    | VSR7          | VACUOLAR SORTING RECEPTOR 7                                                  |
|            |                           | AT5G18370        | -1.7          | p                | cleavage    | DSC2          | DOMINANT SUPPRESSOR OF CAMTA3 NUMBER 2                                       |
|            |                           | AT1G43886        | -2.5          | p                | cleavage    |               | copla-like retrotransposon family                                            |
| miR5640    | 3.7                       | AT1G61850        | -1.1          | p                | cleavage    |               | Non-specific lipase                                                          |
| miR8176    | 3.1                       | AT3G20935        | -5.9          | p                | cleavage    | CYP705A28     | Cytochrome P450, family 705, subfamily A, polypeptide 28                     |
|            |                           | AT4G37400        | -6.9          | p                | cleavage    | CYP81F3       | Cytochrome P450, family 81, subfamily F, polypeptide 3                       |
|            |                           | AT1G15160        | -2.3          | p                | cleavage    |               | MATE efflux family protein                                                   |

Only miRNAs and targets with log2-fold changes of  $\geq 2$  are shown

<sup>1</sup> log2 fold change of miRNA expression (RKD2-induced vs. CIM callus)

<sup>2</sup> p, predicted target; v, validated target. Target predictions are based on psRNAtarget (Dai and Zhao, 2011). Validated targets according to miRTarBase 7.0 (<http://mirtarbase.mbc.nctu.edu.tw/php/download.php>) and Dai et al. (2018). The complete list of differentially-expressed miRNAs and their predicted/validated targets is given in Table S8.
